# Supplementary material for: An elegant approach for the synthesis of multisubstituted imidazole via FeCl 3 /SiO 2 catalyzed activation of acetals: a photophysical study of an imidazole–carbazole hybrid
Source: Royal Society of Chemistry journal article supplement (doi:10.1039/d4ra06436d), 2024-01-01
Supplement: d4ra06436d1.pdf [file d4ra06436d1.pdf]

## SUPPORTING INFORMATION

### An elegant approach for the synthesis of multisubstituted imidazole via FeCl<sub>3</sub>/SiO<sub>2</sub> catalysed activation of acetals: A photo physical study of imidazole-carbazole hybrid

Barnali Das,<sup>a</sup> Arghyadeep Bhattacharyya,<sup>a</sup> Bhaswati Paul,<sup>b</sup> Ramalingam Natarajan<sup>b</sup> and Swapan Majumdar\*<sup>a</sup>

<sup>a</sup>Department of Chemistry, Tripura University, Suryamaninagar, 799 022, India

<sup>b</sup>CSIR-Indian Institute of Chemical Biology, 4, Raja S. C. Mullick Road, Kolkata 700 032, INDIA

| Contents                                                                                                  | Pages   |
|-----------------------------------------------------------------------------------------------------------|---------|
| Experimental: General                                                                                     | S2      |
| Preparation of silica supported Ferric Chloride reagent                                                   | S3      |
| General experimental procedure for the synthesis of <b>tri – and tetra substituted imidazoles 3 and 5</b> | S3      |
| Physical and Spectral data of <b>3a-g</b>                                                                 | S3-S5   |
| Physical and Spectral data of <b>3h</b>                                                                   | S5      |
| Physical and Spectral data of <b>5a-g</b>                                                                 | S6-S8   |
| <sup>1</sup> H and <sup>13</sup> C NMR Spectra of <b>3a-h</b>                                             | S9-S16  |
| <sup>1</sup> H and <sup>13</sup> C NMR Spectra of <b>5a-g</b>                                             | S17-S23 |
| HRMS spectra of <b>3d</b>                                                                                 | S24     |
| HRMS spectra of <b>3e</b>                                                                                 | S24     |
| HRMS spectra of <b>3h</b>                                                                                 | S25     |
| HRMS spectra of <b>5f</b>                                                                                 | S25     |
| HRMS spectra of <b>5g</b>                                                                                 | S26     |
| <b>ORTEP diagram of 5g</b>                                                                                | S26     |
| <b>Figure S1.</b> Absorption, emission and excitation spectra of <b>5g</b> in various solvents            | S27     |
| <b>Figure S2.</b> Lifetime emission decays of <b>5g</b> in aprotic solvents (15 μM).                      | S27     |
| <b>Figure S3.</b> Lifetime emission decays of <b>5g</b> in protic solvents (15 μM).                       | S28     |
| <b>References</b>                                                                                         | S28     |
| <b>HPLC chromatogram of 5g</b>                                                                            | S29     |
| <b>XRD of 5g</b>                                                                                          | S30     |

## Experimental Section

### General

NMR spectra were measured on a Bruker Ascend 400 spectro-photometer.  $^1\text{H}$  NMR and  $^{13}\text{C}$  NMR spectra were recorded at ambient temperature using 400 MHz spectrometers (400 MHz for  $^1\text{H}$  and 100 MHz for  $^{13}\text{C}$ ). Chemical shifts were reported in parts per million from the tetramethyl silane internal reference, and coupling constants were reported in Hertz. Proton multiplicities were represented as s (singlet), d (doublet), dd (double doublet), t (triplet), q (quartet), and m (multiplet). FTIR spectra were recorded on Bruker Alpha II FTIR spectrometer on Neat or KBr pellets. Mass spectra (HRMS) were obtained from Orbitrap Exploris 120 (Thermo Scientific) using 70 eV in positive ion mode. The single-crystal X-ray diffraction (XRD) data were collected on a Bruker D8 Venture system with a microfocus optics using Cu K $\alpha$  radiation. The data were analysed and processed with Bruker Apex III software suite 61 incorporated with multiple tools such as cell\_now and RLATT for the determination of the unit cell, SAINT-plus for data reduction, and SADABS for absorption correction. The structure solutions were performed with SHELXT and the full-matrix least-squares refinements were performed with SHELXL suite of programs incorporated in Olex 2.6. The steady state absorption spectra were collected on a Shimadzu® UV-1900 Absorption spectrophotometer. The steady state emission spectra were collected in a Shimadzu RF-6000 emission spectrophotometer. Emission lifetime experiments were performed using a HORIBA® Jobin-Yvon TCSPC setup using a nano-LED light source of 296 nm (IRF~0.6 ns). Emission lifetime data were deconvoluted and fitted using the DAS-6 software by HORIBA which allows individual and batch fits.

### Materials

All reagents were purchased either from Sigma Aldrich chemical Co., USA, Across chemical company or SRL India and was used as received unless otherwise specified. Commercially supplied petroleum ether (60–80°C) and ethyl acetate was distilled before use. Column chromatography was performed on silica gel (60–120 mesh, 0.12–0.25 mm). Analytical thin-layer chromatography (TLC) was performed on 0.25 mm extra-hard silica gel plates with a UV254 fluorescent indicator. Silica-supported ferric chloride reagent was prepared as per procedure described by us using silica-gel 230-400 mesh.

## Synthesis

### Preparation of silica supported Ferric Chloride

To the slurry of silica gel (230-400 mesh, 40.0g) in acetone (80.0 mL), anhydrous ferric chloride (5.0 g, 30.83 mmol) was added with vigorous stirring for 1hr. The excess acetone was removed under reduced pressure and then the mixture was dried under vacuum for 24 hrs to obtain a free flowing solid. The catalyst was stored in a brown color bottle at 4°C for longer shelf life. This supporting reagent was then characterized by FESEM and EDAX.

### General procedure for the synthesis of tri and tetra-substituted imidazoles:

A small glass vial was charged with catalyst (FeCl<sub>3</sub>/SiO<sub>2</sub>) (20 mg, 2 mol% of FeCl<sub>3</sub>), benzil (1.0 mmol), acetal (1.1 mmol), ammonium acetate (5.0 mmol) [for trisubstituted imidazoles] or ammonium acetate (2.5 mmol) and amine (2.5 mmol) [for tetra-substituted imidazoles] and then the mixture was heated at 100°C until the full consumption of benzil (TLC). After completion of reaction, the reaction mixture was diluted with EtOAc (5 mL), filtered and washed the catalyst with ethyl acetate. The combined filtrate was evaporated under vacuum. The desired product was isolated either by crystallization or by column chromatography using ethyl acetate-hexane (1:3 to 3:1).

### Physical and spectral data of tri-substituted imidazole 3a-g

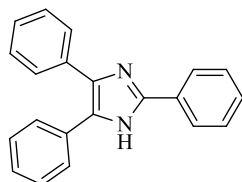

2,4,5-triphenyl-1H-imidazole (**3a**):<sup>1</sup> Yield: 93%, white solid, m. p. 264 - 266 °C, lit. m. p. 269 °C; IR (KBr)  $\nu_{\max}$  3043, 1591, 1490, 1130 cm<sup>-1</sup>; <sup>1</sup>H NMR (400 MHz, DMSO-d<sub>6</sub>)  $\delta$  12.70 (s, 1H), 8.09 (d,  $J = 7.6$  Hz, 2H), 7.56 (d,  $J = 7.6$  Hz, 2H), 7.52 - 7.44 (m, 6H), 7.38 (t,  $J = 7.2$  Hz, 2H), 7.31 (t,  $J = 7.6$  Hz, 2H), 7.23 (t,  $J = 7.2$  Hz, 1H); <sup>13</sup>C NMR (100 MHz, DMSO-d<sub>6</sub>)  $\delta$  145.9, 137.6, 135.6, 131.6, 130.8, 129.2, 129.1, 128.9, 128.7, 128.6, 128.2, 127.5, 127.0, 125.6.

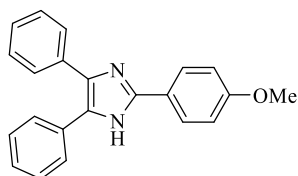

2-(4-methoxyphenyl)-4,5-diphenyl-1H-imidazole (**3b**):<sup>2</sup> Yield: 90%, white solid, m. p. 230 - 232 °C, lit. m. p. 232 °C ; IR (KBr)  $\nu_{\max}$  2953, 1613, 1492, 1239 cm<sup>-1</sup>; <sup>1</sup>H NMR (400 MHz, DMSO-d<sub>6</sub>)  $\delta$  12.52 (s, 1H), 8.02 (d,  $J = 8.8$  Hz, 2H), 7.55 (d,  $J = 7.6$  Hz, 2H), 7.50 (d,  $J = 7.2$

Hz, 2H), 7.44 (t,  $J = 7.6$  Hz, 2H), 7.37 (t,  $J = 7.2$  Hz, 1H), 7.30 (t,  $J = 8.0$  Hz, 2H), 7.23 (t,  $J = 7.2$  Hz, 1H), 7.05 (d,  $J = 8.8$  Hz, 2H);  $^{13}\text{C}$  NMR (100 MHz, DMSO- $d_6$ )  $\delta$  159.9, 146.1, 137.2, 135.8, 131.7, 129.1, 128.8, 128.7, 128.6, 128.1, 128.0, 127.7, 127.5, 127.2, 126.9, 123.6, 114.6, 113.8, 55.7

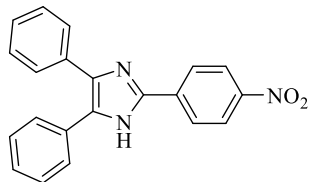

2-(4-nitrophenyl)-4,5-diphenyl-1H-imidazole (**3c**):<sup>2</sup> Yield: 92%, yellow solid, m. p. 230 - 232 °C, lit. m. p. 232-234 °C; IR (KBr)  $\nu_{\text{max}}$  3072, 1589, 1513, 1332, 848  $\text{cm}^{-1}$ ;  $^1\text{H}$  NMR (400 MHz, DMSO- $d_6$ )  $\delta$  13.15 (s, 1H), 8.34 (m, 4H), 7.55 (m, 4H), 7.49–7.42 (m, 3H), 7.32 (t,  $J = 7.6$  Hz, 2H), 7.27 (d,  $J = 7.2$  Hz, 1H);  $^{13}\text{C}$  NMR (100 MHz, DMSO- $d_6$ )  $\delta$  147.0, 143.9, 138.9, 136.6, 135.1, 131.0, 130.5, 129.2, 129.0, 128.7, 128.6, 127.6, 127.4, 126.2, 124.7.

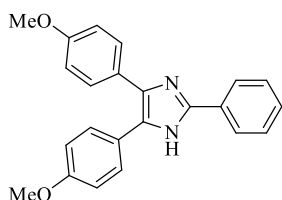

4,5-bis(4-methoxyphenyl)-2-phenyl-1H-imidazole (**3d**): Yield: 90%, white solid, m. p. 170 - 172 °C; IR (KBr)  $\nu_{\text{max}}$  2944, 2830, 1501, 1241, 1174, 830, 690  $\text{cm}^{-1}$ ;  $^1\text{H}$  NMR (400 MHz,  $\text{CDCl}_3$ )  $\delta$  7.86 (d,  $J = 6.8$  Hz, 2H), 7.42–7.35 (m, 7H), 6.84 (d,  $J = 8.0$  Hz, 4H), 3.81 (s, 6H);  $^{13}\text{C}$  NMR (100 MHz,  $\text{CDCl}_3$ )  $\delta$  158.8, 145.6, 132.3, 130.0, 129.1, 128.7, 128.5, 125.4, 125.3, 113.9, 55.2; HRMS calcd for ( $\text{C}_{23}\text{H}_{20}\text{N}_2\text{O}_2 + \text{H}^+$ ) 357.1603, found: 357.1591 ( $\text{M} + \text{H}^+$ ).

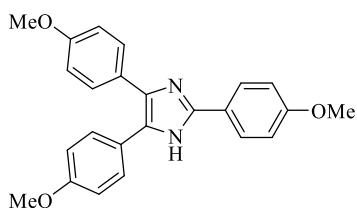

2,4,5-tris(4-methoxyphenyl)-1H-imidazole (**3e**): Yield: 87%, white solid, m. p. 162-164 °C; IR (KBr)  $\nu_{\text{max}}$  2943, 2832, 1610, 1500, 1239, 1173, 1024, 826  $\text{cm}^{-1}$ ;  $^1\text{H}$  NMR (400 MHz,  $\text{CDCl}_3$ )  $\delta$  7.80 (d,  $J = 7.6$  Hz, 2H), 7.43 (d,  $J = 7.2$  Hz, 4H), 6.91 (d,  $J = 8.0$  Hz, 2H), 6.85 (d,  $J = 8.0$  Hz, 4H), 3.83 (s, 3H), 3.82 (s, 6H);  $^{13}\text{C}$  NMR (100 MHz,  $\text{CDCl}_3$ )  $\delta$  160.0, 158.8, 145.6, 129.0, 126.8, 125.6, 122.9, 114.2, 113.9, 55.3, 55.2; HRMS calcd for ( $\text{C}_{24}\text{H}_{22}\text{N}_2\text{O}_3 + \text{H}^+$ ) 387.1708, found: 387.1697 ( $\text{M} + \text{H}^+$ ).

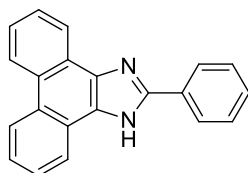

2-phenyl-1H-phenanthro [9,10-d]imidazole (**3f**):<sup>3</sup> Yield: 87%, white solid, m. p. 302-304 °C, lit. m. p. 311-313 °C; IR (KBr)  $\nu_{\max}$  3058, 1459 1137, 924, 755, 701  $\text{cm}^{-1}$ ;  $^1\text{H}$  NMR (400 MHz, DMSO- $d_6$ )  $\delta$  13.48 (s, 1H), 8.89 – 8.83 (m, 2H), 8.62 – 8.57 (m, 2H), 8.34 - 8.30 (s, 2H), 7.79 – 7.72 (m, 2H), 7.65 – 7.59 (m, 4H), 7.51 (t,  $J = 7.2$  Hz, 1H);  $^{13}\text{C}$  NMR (100 MHz, DMSO- $d_6$ )  $\delta$  149.6, 137.5, 130.9, 129.7, 129.4, 128.2, 128.0, 127.6, 127.5, 127.5, 126.6, 125.8, 125.6, 124.6, 124.2, 122.9, 122.5, 122.4

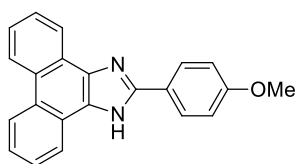

2-(4-methoxyphenyl)-1H-phenanthro [9,10-d]imidazole (**3g**):<sup>4</sup> Yield: 88%, white solid, m. p. 252 - 254 °C, lit. m. p. 255-256 °C; IR (KBr)  $\nu_{\max}$  1605, 1470, 1243, 1172, 1030, 826  $\text{cm}^{-1}$ ;  $^1\text{H}$  NMR (400 MHz, DMSO- $d_6$ )  $\delta$  13.3 (s, 1H), 8.84 (d,  $J = 7.6$  Hz, 2H), 8.57 (s, 2H), 8.27 (d,  $J = 7.6$  Hz, 2H), 7.73 (t,  $J = 7.2$  Hz, 2H), 7.62 (t,  $J = 7.6$  Hz, 2H), 7.18 (d,  $J = 8.8$  Hz, 2H), 3.87 (s, 3H);  $^{13}\text{C}$  NMR (100 MHz, DMSO- $d_6$ )  $\delta$  160.7, 149.8, 128.2, 127.9, 127.5, 125.5, 124.4, 123.5, 122.3, 114.8, 55.8.

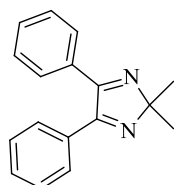

2,2-dimethyl-4,5-diphenyl-2H-imidazole (**3h**): Yield: 85%, white solid, m. p. 58 - 60 °C; IR (KBr)  $\nu_{\max}$  3053, 2981, 2929, 1610, 1492, 1445, 1215, 801  $\text{cm}^{-1}$ ;  $^1\text{H}$  NMR (400 MHz,  $\text{CDCl}_3$ )  $\delta$  7.54 -7.52 (m, 4H), 7.46 (t,  $J = 7.6$  Hz, 2H), 7.37 (t,  $J = 7.6$  Hz, 4H), 1.68 (s, 6H);  $^{13}\text{C}$  NMR (100 MHz,  $\text{CDCl}_3$ )  $\delta$  164.2, 132.7, 130.2, 128.9, 128.3, 101.6, 24.2; HRMS calcd for ( $\text{C}_{17}\text{H}_{16}\text{N}_2 + \text{H}^+$ ) 249.1392, found: 249.1434 ( $\text{M} + \text{H}^+$ ).

### Physical and Spectral data of 5a-g

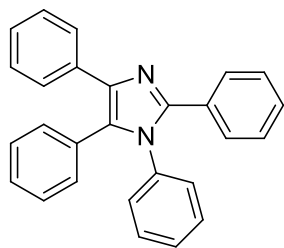

1,2,4,5-tetraphenyl-1H-imidazole (**5a**):<sup>2</sup> Yield: 91%, white solid, m. p. 216-218 °C, lit. m. p. 220 °C; IR (KBr)  $\nu_{\max}$  3742, 3603, 3052, 1486, 1136, 918, 764, 686  $\text{cm}^{-1}$ ;  $^1\text{H}$  NMR (400 MHz,  $\text{CDCl}_3$ )  $\delta$  7.64- 7.62 (m, 2H), 7.47 (d,  $J = 1.6$  Hz, 1H), 7.45 (d,  $J = 2.4$  Hz, 1H), 7.33 – 7.20 (m, 12H), 7.17 (d,  $J = 1.6$  Hz, 1H), 7.14 (d,  $J = 2.0$  Hz, 1H), 7.07 (d,  $J = 1.2$  Hz, 1H), 7.05 (d,  $J = 2.0$  Hz, 1H);  $^{13}\text{C}$  NMR (100 MHz,  $\text{CDCl}_3$ )  $\delta$  146.9, 138.2, 137.0, 134.4, 131.1, 130.8, 130.6, 130.4, 129.0, 128.9, 128.4, 128.3, 128.2, 128.1, 128.0, 127.9, 127.4, 126.5

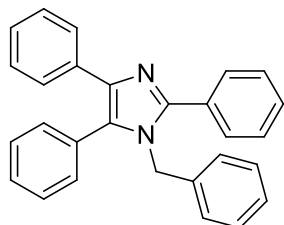

1-benzyl-2,4,5-triphenyl-1H-imidazole (**5b**):<sup>5</sup> Yield: 93%, white solid, m. p. 162-164 °C, lit. m. p. 170 °C; IR (KBr)  $\nu_{\max}$  3057, 1597, 1443, 1080, 919, 690  $\text{cm}^{-1}$ ;  $^1\text{H}$  NMR (400 MHz,  $\text{CDCl}_3$ )  $\delta$  7.70 - 7.68 (m, 2H), 7.63 – 7.61 (m, 2H), 7.44 – 7.42 (m, 3H), 7.39 – 7.32 (m, 3H), 7.26 – 7.16 (m, 8H), 6.85 – 6.83 (m, 2H), 5.14 (s, 2H);  $^{13}\text{C}$  NMR (100 MHz,  $\text{CDCl}_3$ )  $\delta$  148.0, 138.0, 137.5, 134.4, 131.0, 130.9, 130.0, 129.0, 128.8, 128.7, 128.5, 128.5, 128.0, 127.3, 126.7, 126.3, 125.9, 48.2.

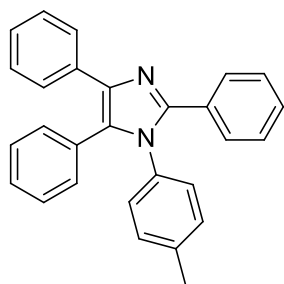

2,4,5-triphenyl-1-(p-tolyl)-1H-imidazole (**5c**):<sup>6</sup> Yield: 89%, white solid, m. p. 280-182 °C, lit. m. p. 284-285 °C; IR (KBr)  $\nu_{\max}$  3027, 1596, 1393, 1137, 1079, 830, 689  $\text{cm}^{-1}$ ;  $^1\text{H}$  NMR (400 MHz,  $\text{CDCl}_3$ )  $\delta$  7.62 (d,  $J = 7.2$  Hz, 2H), 7.49 - 7.47 (m, 2H), 7.29 – 7.19 (m, 9H), 7.18 – 7.15 (m, 2H), 7.07 (d,  $J = 8.4$  Hz, 2H), 6.94 (d,  $J = 8.0$  Hz, 2H), 2.34 (s, 3H);  $^{13}\text{C}$  NMR

(100 MHz, CDCl<sub>3</sub>)  $\delta$  147.0, 138.2, 138.1, 134.5, 134.5, 131.2, 130.9, 130.8, 130.7, 129.7, 129.0, 128.3, 128.2, 128.2, 128.1, 128.1, 127.9, 127.4, 126.6, 21.2

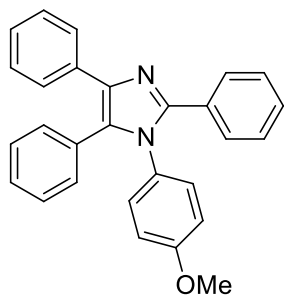

1-(4-methoxyphenyl)-2,4,5-triphenyl-1H-imidazole (**5d**):<sup>7</sup> Yield: 85%, white solid, m. p. 180 – 182 °C, lit. m.p. 185-186 °C; IR (KBr)  $\nu_{\max}$  1598, 1290, 1240, 1025, 835, 770, 691 cm<sup>-1</sup>; <sup>1</sup>H NMR (400 MHz, CDCl<sub>3</sub>)  $\delta$  7.62 (d, *J* = 7.6 Hz, 2H), 7.48 (t, *J* = 4.4 Hz, 2H), 7.27 – 7.21 (m, 9H), 7.17 - 7.16 (m, 2H), 6.99 (d, *J* = 8.4 Hz, 2H), 6.78 (d, *J* = 8.4 Hz, 2H), 3.79 (s, 3H); <sup>13</sup>C NMR (100 MHz, CDCl<sub>3</sub>)  $\delta$  159.1, 147.1, 138.1, 134.5, 131.2, 131.1, 130.8, 130.6, 129.9, 129.4, 128.9, 128.3, 128.2, 128.2, 128.1, 127.9, 127.4, 126.6, 114.2, 55.4.

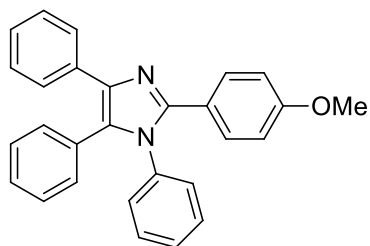

2-(4-methoxyphenyl)-1,4,5-triphenyl-1H-imidazole (**5e**):<sup>8</sup> Yield: 82%, white solid, m. p. 180 – 182 °C, lit. m. p. 180-182 °C; IR (KBr)  $\nu_{\max}$  2197, 1951, 1482, 1182, 918, 765, 691 cm<sup>-1</sup>; <sup>1</sup>H NMR (400 MHz, CDCl<sub>3</sub>)  $\delta$  7.62-7.63 (m, 2H), 7.38 (d, *J* = 8.8 Hz, 2H), 7.30 – 7.19 (m, 10H), 7.15 (d, *J* = 1.6 Hz, 1H), 7.13 (d, *J* = 2.0 Hz, 1H), 7.07 (d, *J* = 1.6 Hz, 1H), 7.05 (d, *J* = 2.4 Hz, 1H), 6.79 (d, *J* = 8.8 Hz, 2H), 3.80 (s, 3H); <sup>13</sup>C NMR (100 MHz, CDCl<sub>3</sub>)  $\delta$  159.6, 146.9, 138.0, 137.3, 134.5, 131.1, 130.8, 130.5, 130.3, 129.1, 128.5, 128.3, 128.2, 128.1, 127.9, 127.4, 126.5, 123.1, 113.6, 55.2.

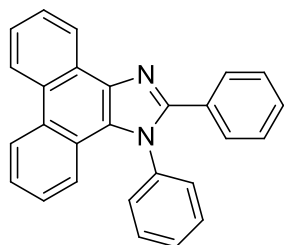

1,2-diphenyl-1H-phenanthro[9,10-d]imidazole (**5f**): Yield: 86%, white solid, m. p. 192 – 194 °C; IR (KBr)  $\nu_{\max}$  1693, 1459, 1385, 1136, 919, 692 cm<sup>-1</sup>; <sup>1</sup>H NMR (400 MHz, CDCl<sub>3</sub>)  $\delta$  8.92 (d, *J* = 8.0 Hz, 1H), 8.80 – 8.72 (m, 2H), 7.79 – 7.54 (m, 10H), 7.33 – 7.20 (m, 5H);

$^{13}\text{C}$  NMR (100 MHz,  $\text{CDCl}_3$ )  $\delta$  151.0, 138.7, 137.4, 130.5, 130.1, 129.8, 129.5, 129.3, 129.1, 128.8, 128.3, 128.2, 128.1, 127.3, 127.2, 126.3, 125.6, 124.9, 124.1, 123.1, 123.1, 122.8, 120.9; HRMS calcd for ( $\text{C}_{27}\text{H}_{18}\text{N}_2 + \text{H}^+$ ) 371.1548, found: 371.1538 ( $\text{M} + \text{H}^+$ ).

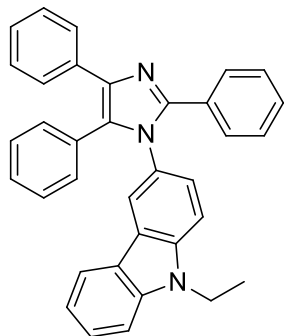

9-ethyl-3-(2,4,5-triphenyl-1H-imidazol-1-yl)-9H-carbazole (**5g**): Yield: 82%, white solid, m. p. 146 – 148 °C ; IR (KBr)  $\nu_{\text{max}}$  3051, 2972, 1593, 1476, 1223, 1136, 1080, 923, 688  $\text{cm}^{-1}$ ;  $^1\text{H}$  NMR (400 MHz,  $\text{CDCl}_3$ )  $\delta$  7.96 (d,  $J = 8.0$  Hz, 1H), 7.83 (s, 1H), 7.67 (d,  $J = 8.0$  Hz, 2H), 7.53 – 7.50 (m, 3H), 7.44 (d,  $J = 8.4$  Hz, 1H), 7.32 – 7.18 (m, 14H), 4.35 (q,  $J = 7.2$  Hz, 2H), 1.46 (t,  $J = 7.6$  Hz, 3H);  $^{13}\text{C}$  NMR (100 MHz,  $\text{CDCl}_3$ )  $\delta$  147.3, 140.5, 139.1, 138.0, 134.7, 131.6, 131.1, 130.9, 130.8, 128.8, 128.6, 128.2, 128.1, 128.0, 127.7, 127.4, 126.5, 126.4, 125.9, 122.9, 122.4, 120.7, 120.4, 119.2, 108.8, 108.5, 37.7, 13.8; HRMS calcd for ( $\text{C}_{35}\text{H}_{27}\text{N}_3 + \text{H}^+$ ) 490.2283, found: 490.2273 ( $\text{M} + \text{H}^+$ ).



# $^1\text{H}$ and $^{13}\text{C}$ NMR Spectra of 3a-h

$^1\text{H}$  NMR (400 MHz, DMSO- $d_6$ ) of (3a)

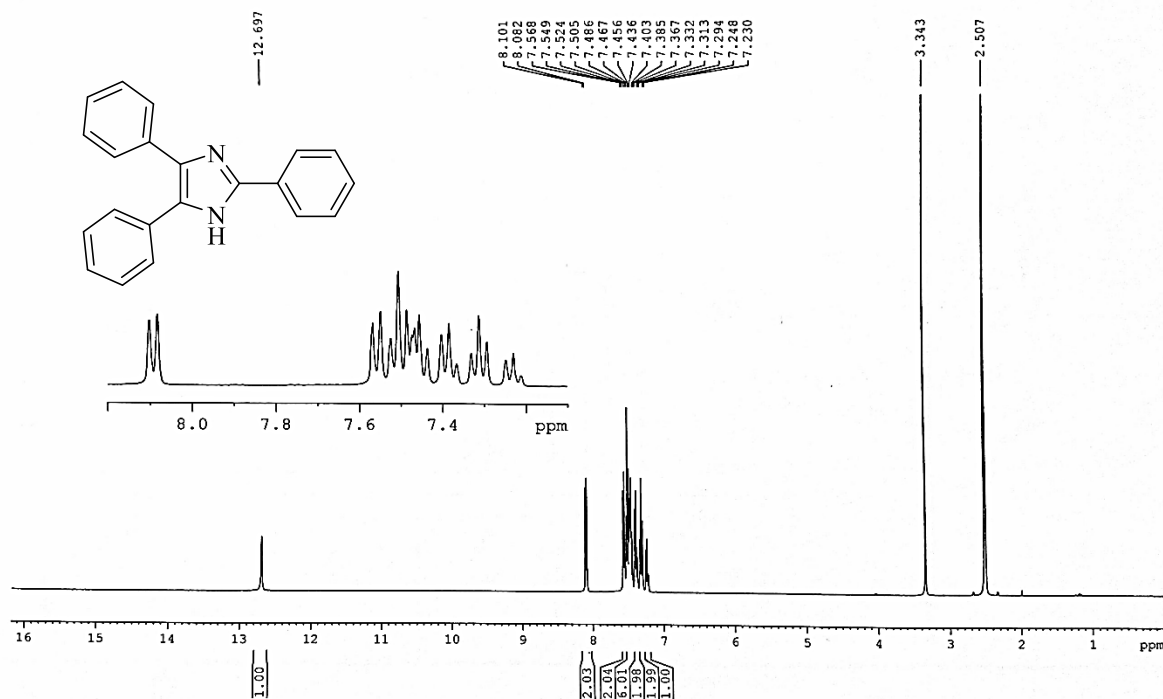

$^{13}\text{C}$  NMR (100 MHz, DMSO- $d_6$ ) of (3a)

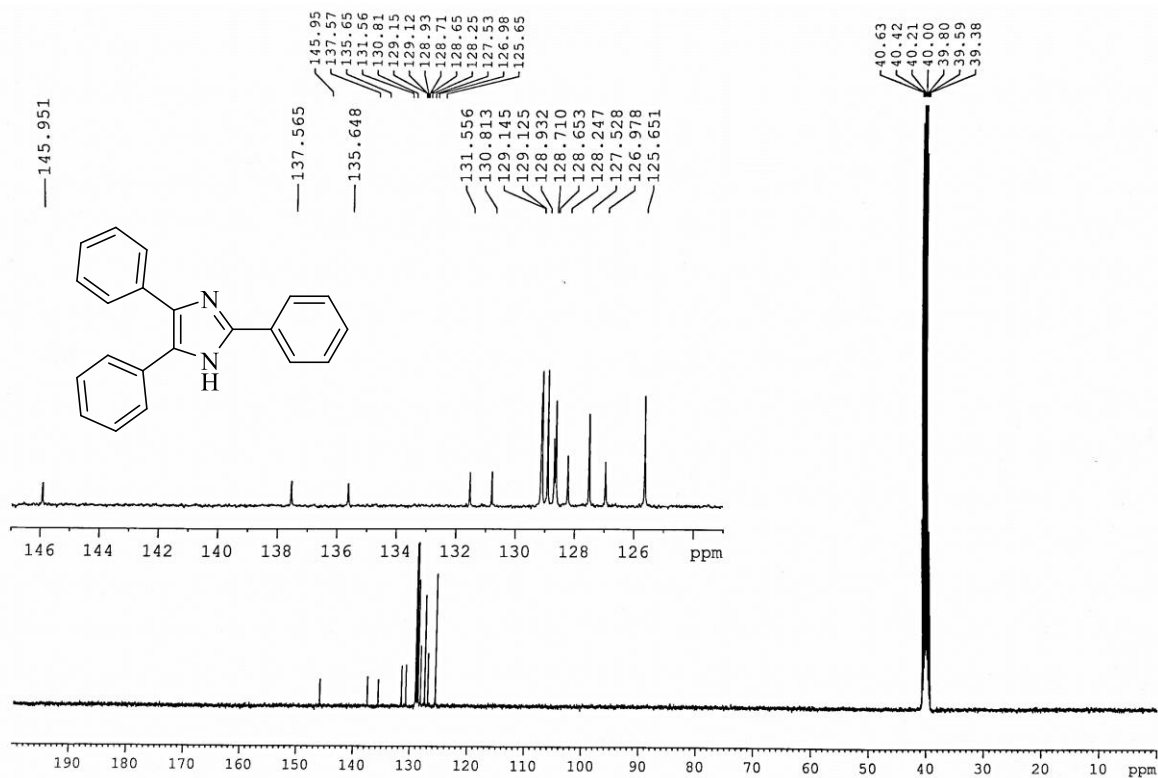

$^1\text{H}$  NMR (400 MHz, DMSO- $d_6$ ) of **(3b)**

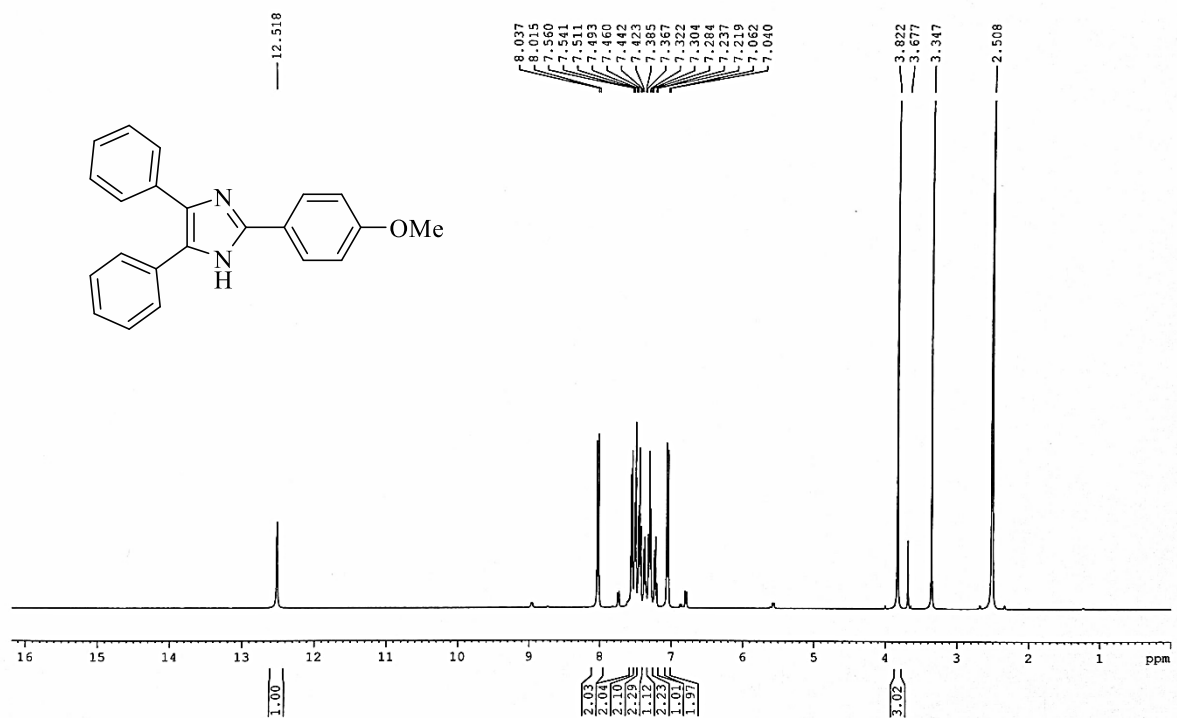

$^{13}\text{C}$  NMR (100 MHz, DMSO- $d_6$ ) of **(3b)**

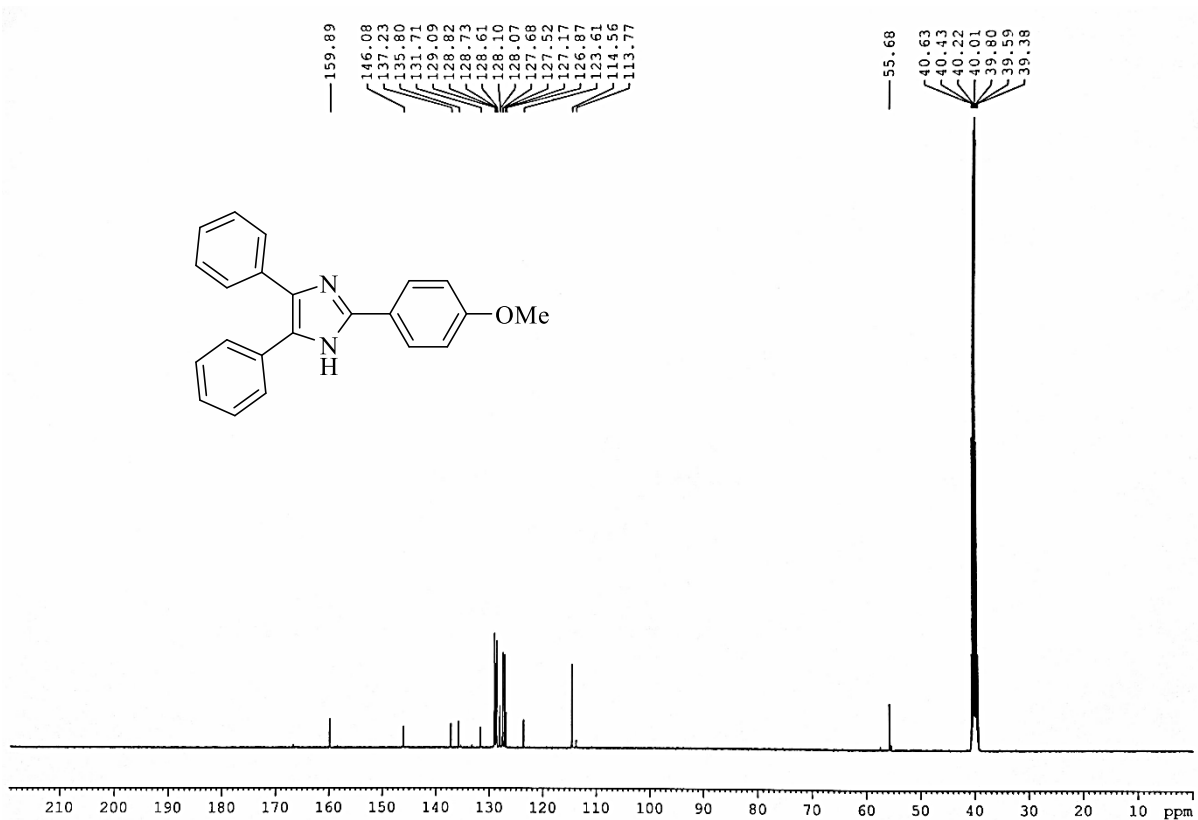

$^1\text{H}$  NMR (400 MHz,  $\text{DMSO-d}_6$ ) of **(3c)**

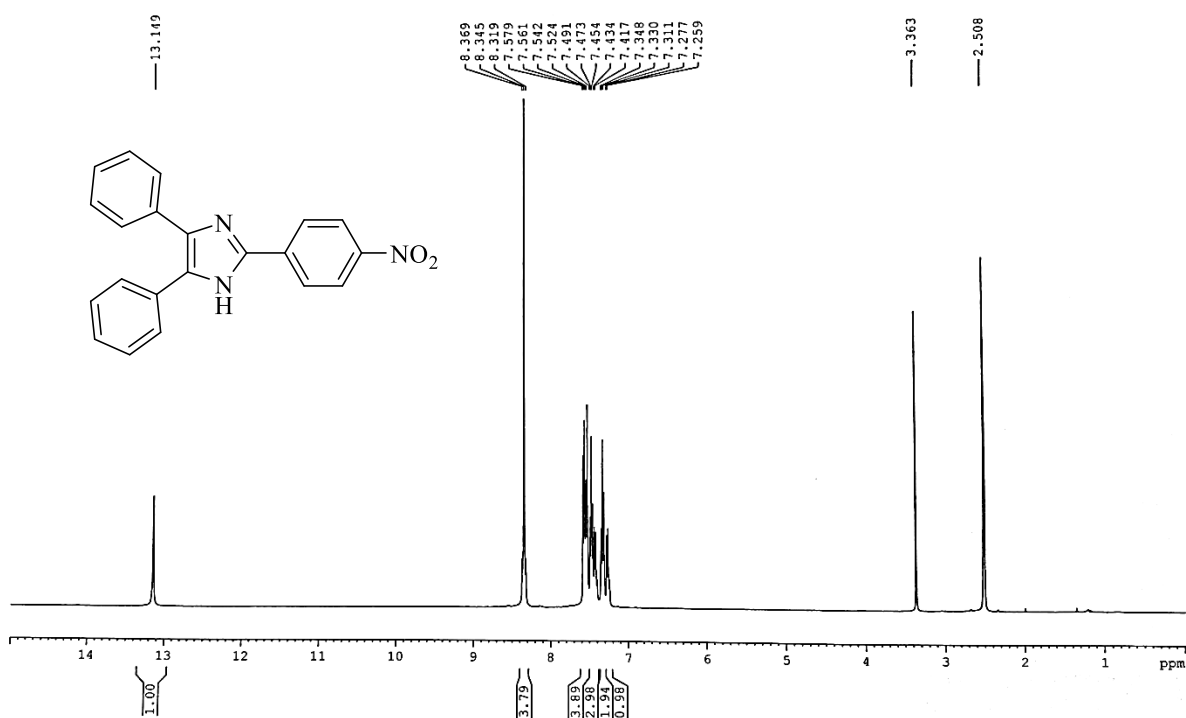

$^{13}\text{C}$  NMR (100 MHz,  $\text{DMSO-d}_6$ ) of **(3c)**

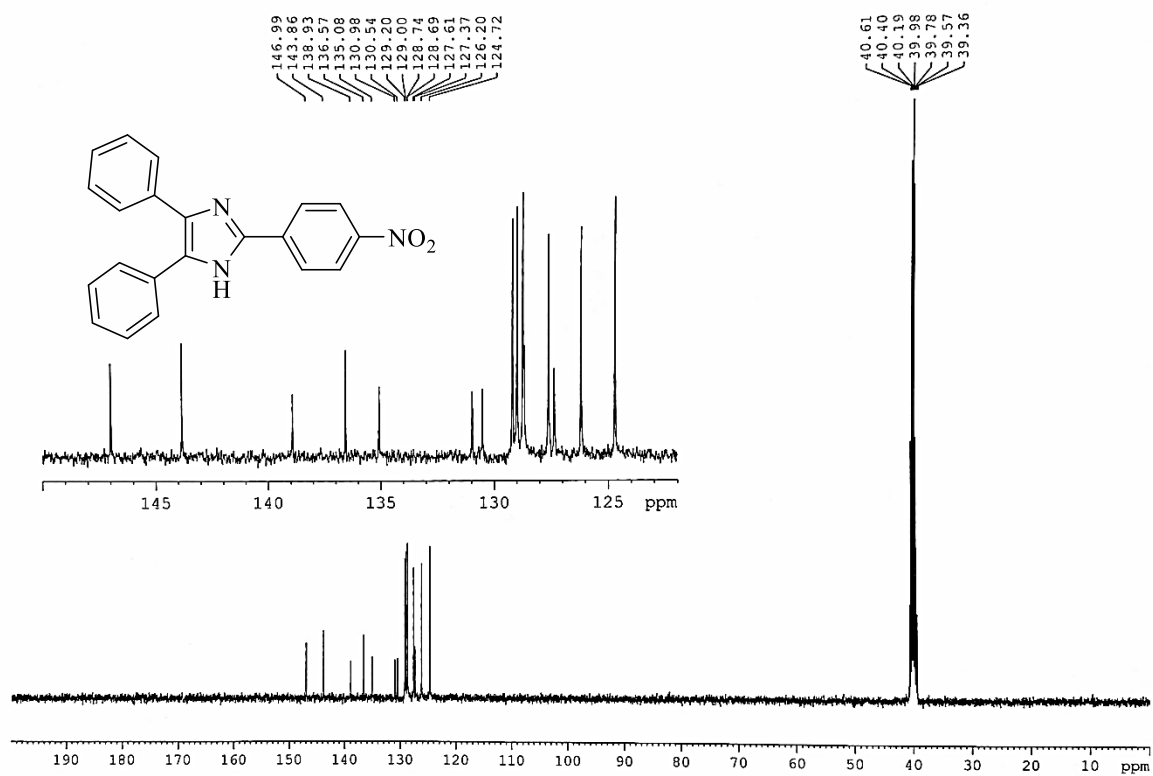

$^1\text{H}$  NMR (400 MHz,  $\text{CDCl}_3$ ) of **(3d)**

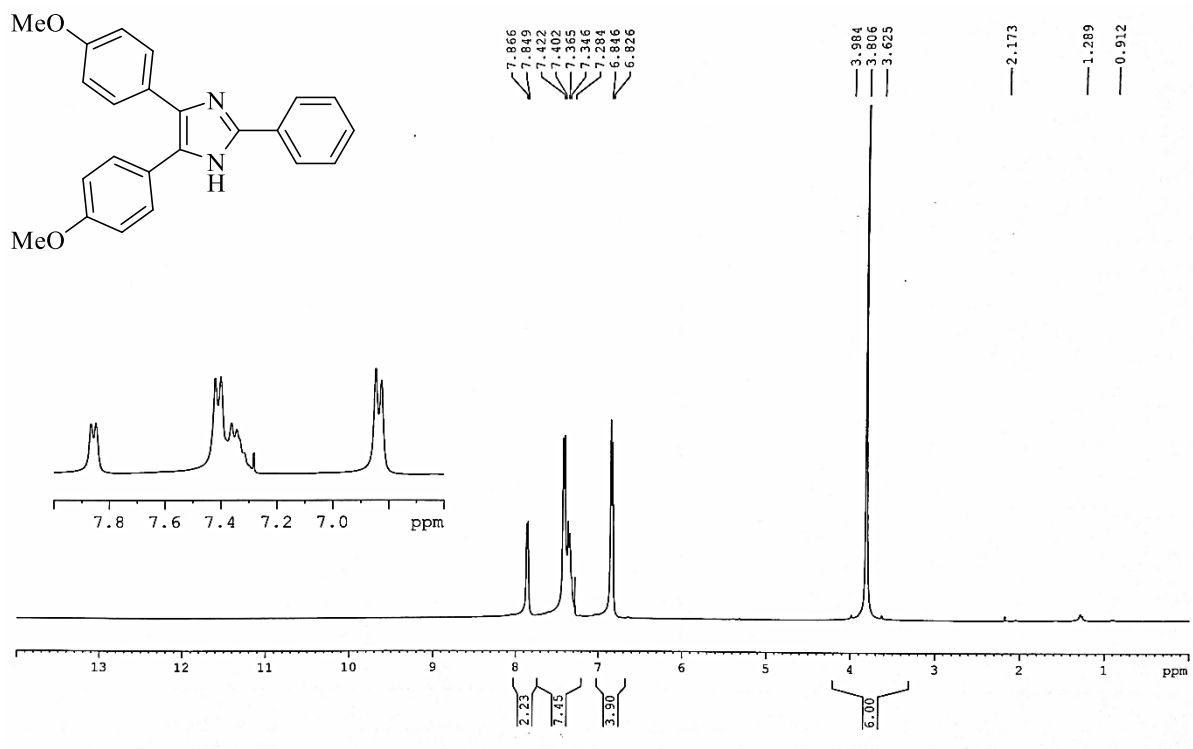

$^{13}\text{C}$  NMR (100 MHz,  $\text{CDCl}_3$ ) of **(3d)**

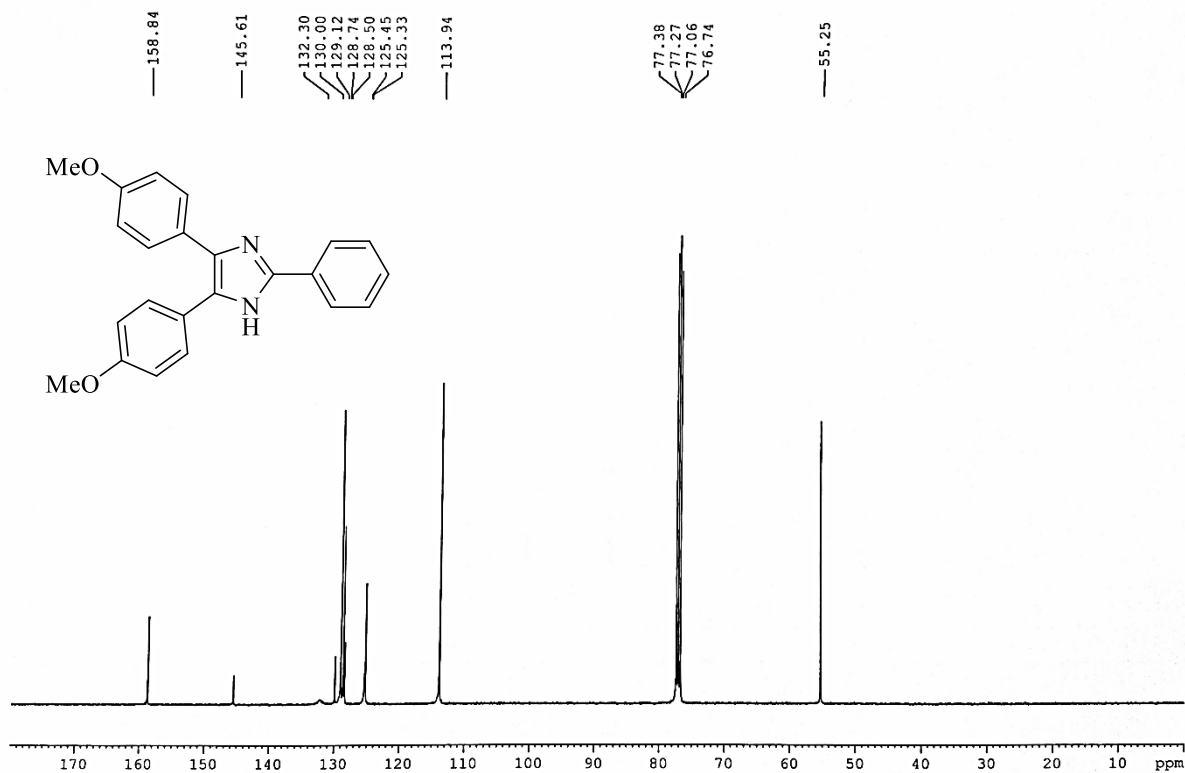

$^1\text{H}$  NMR (400 MHz,  $\text{CDCl}_3$ ) of **(3e)**

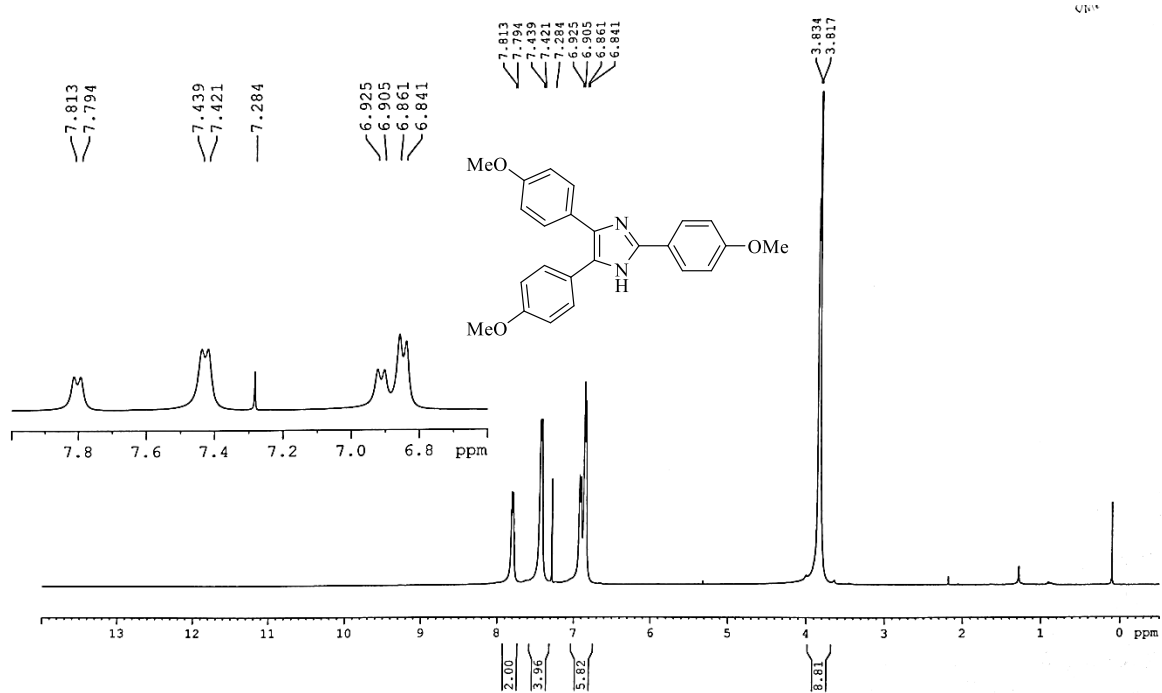

$^{13}\text{C}$  NMR (100 MHz,  $\text{CDCl}_3$ ) of **(3e)**

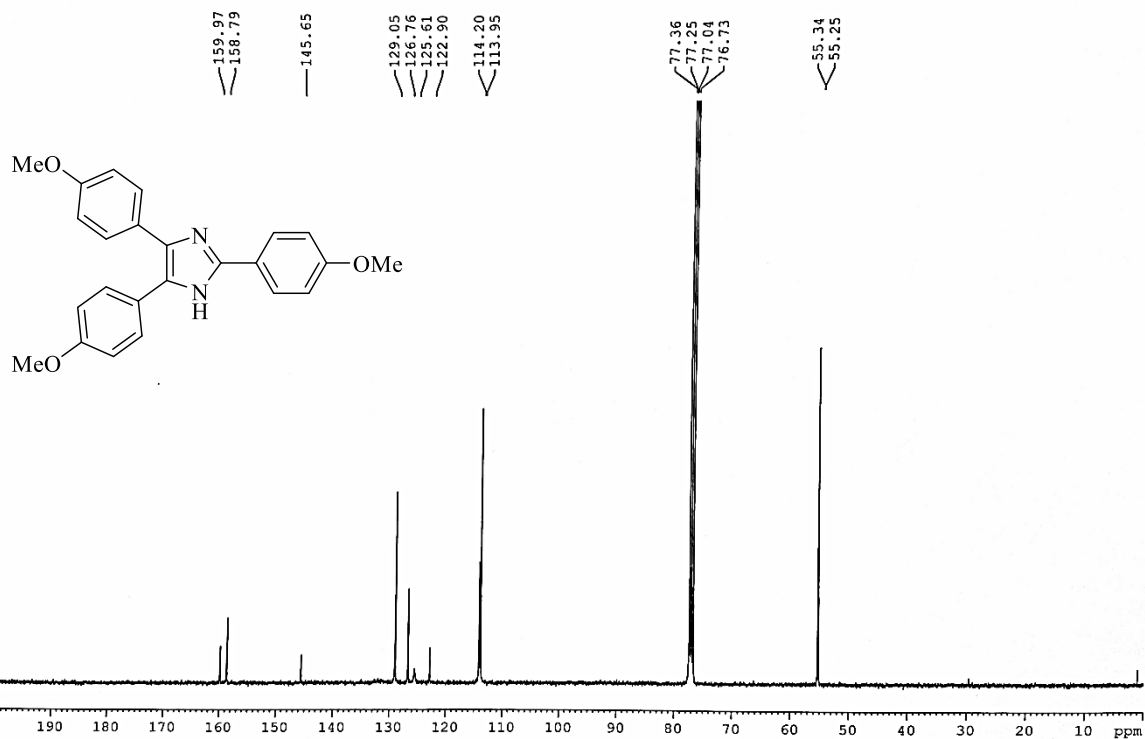

$^1\text{H}$  NMR (400 MHz,  $\text{DMSO-d}_6$ ) of **(3f)**

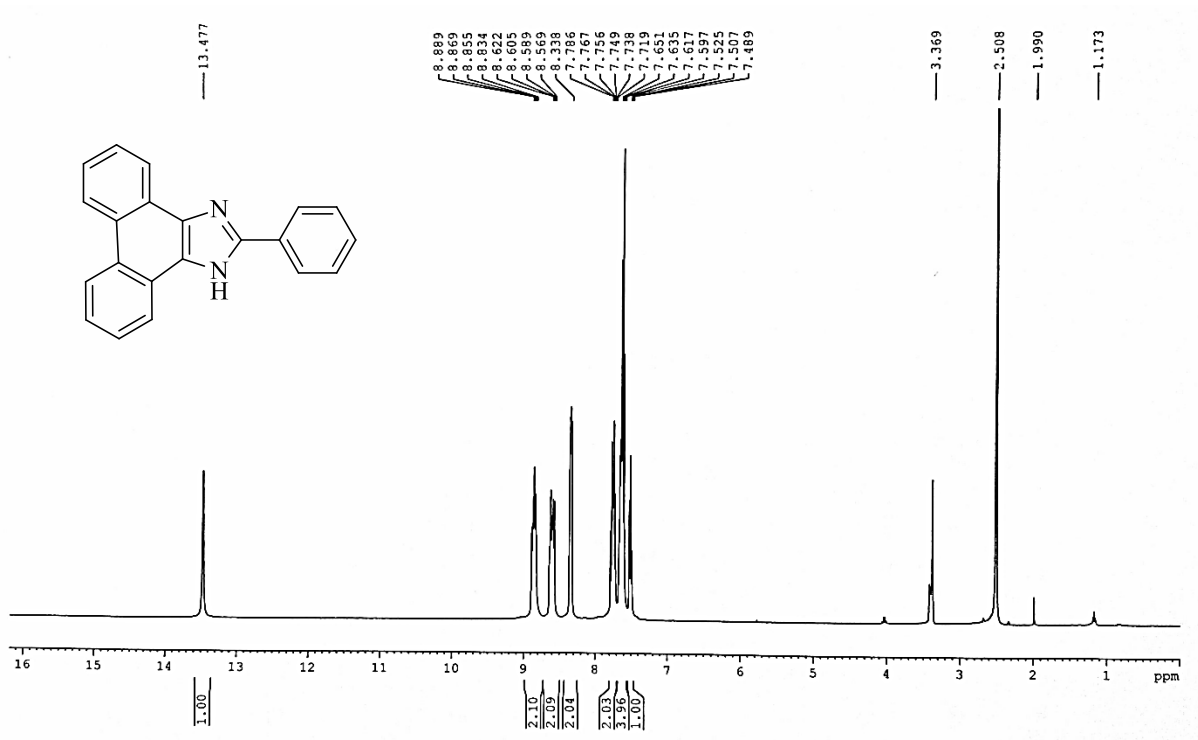

$^{13}\text{C}$  NMR (100 MHz,  $\text{DMSO-d}_6$ ) of **(3f)**

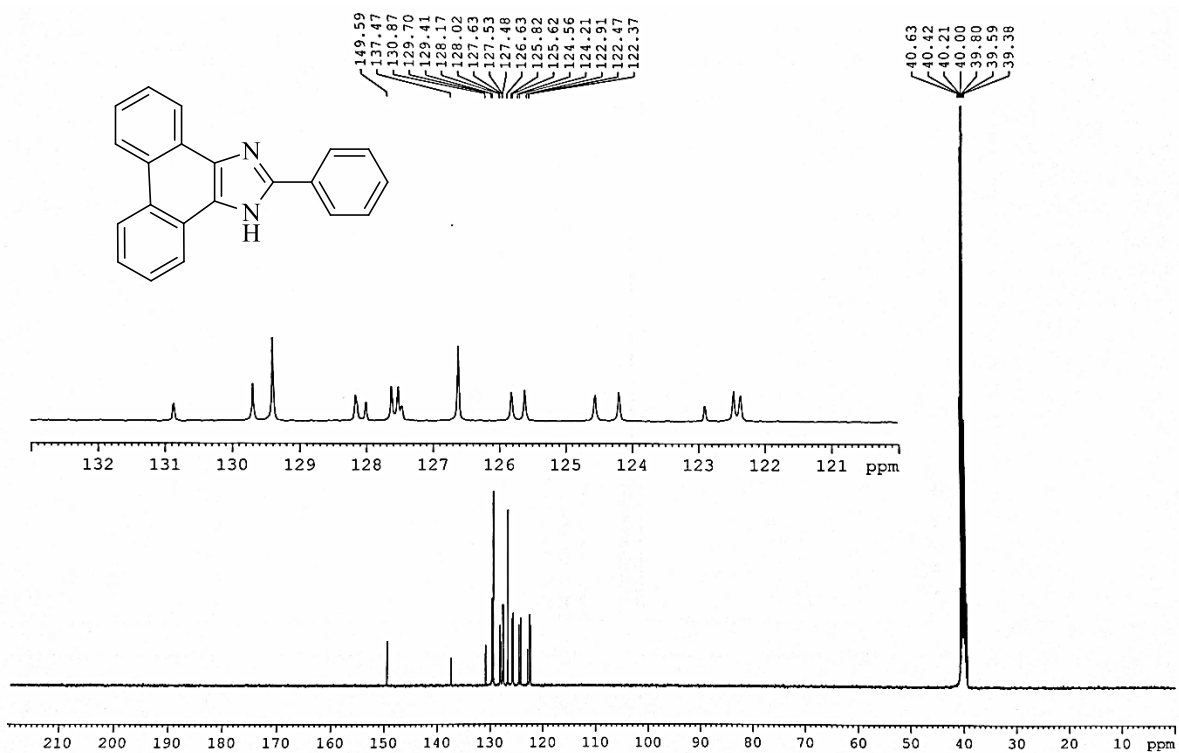

$^1\text{H}$  NMR (400 MHz, DMSO- $d_6$ ) of **(3g)**

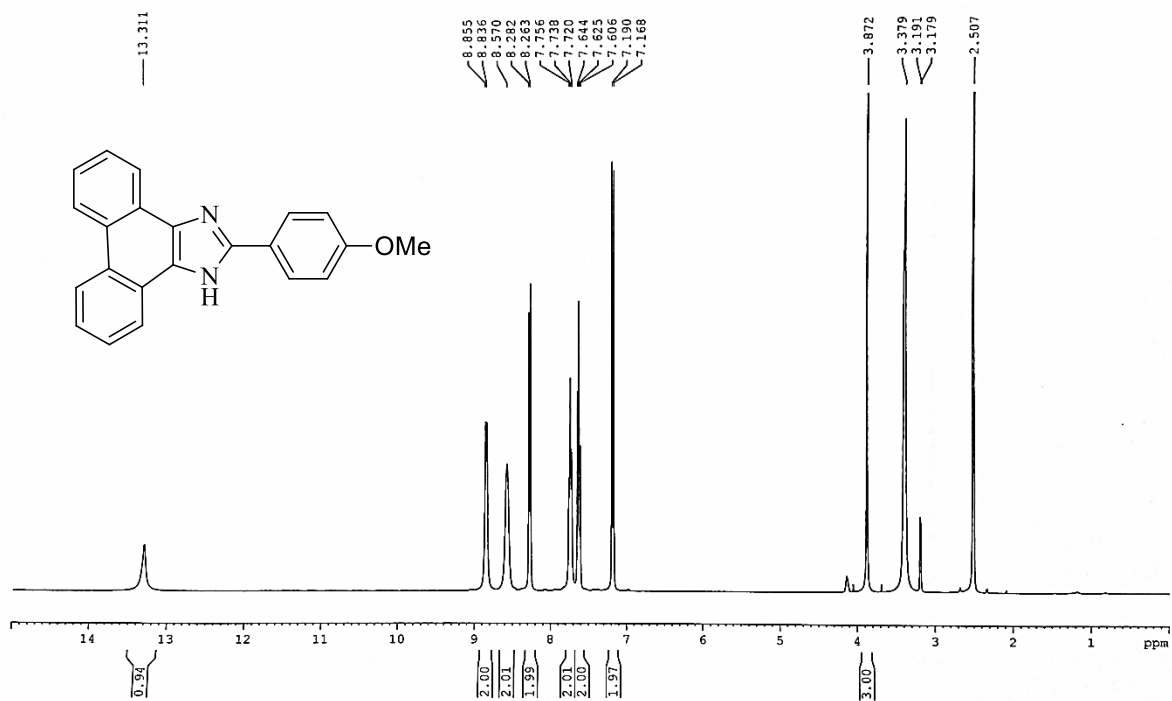

$^{13}\text{C}$  NMR (100 MHz, DMSO- $d_6$ ) of **(3g)**

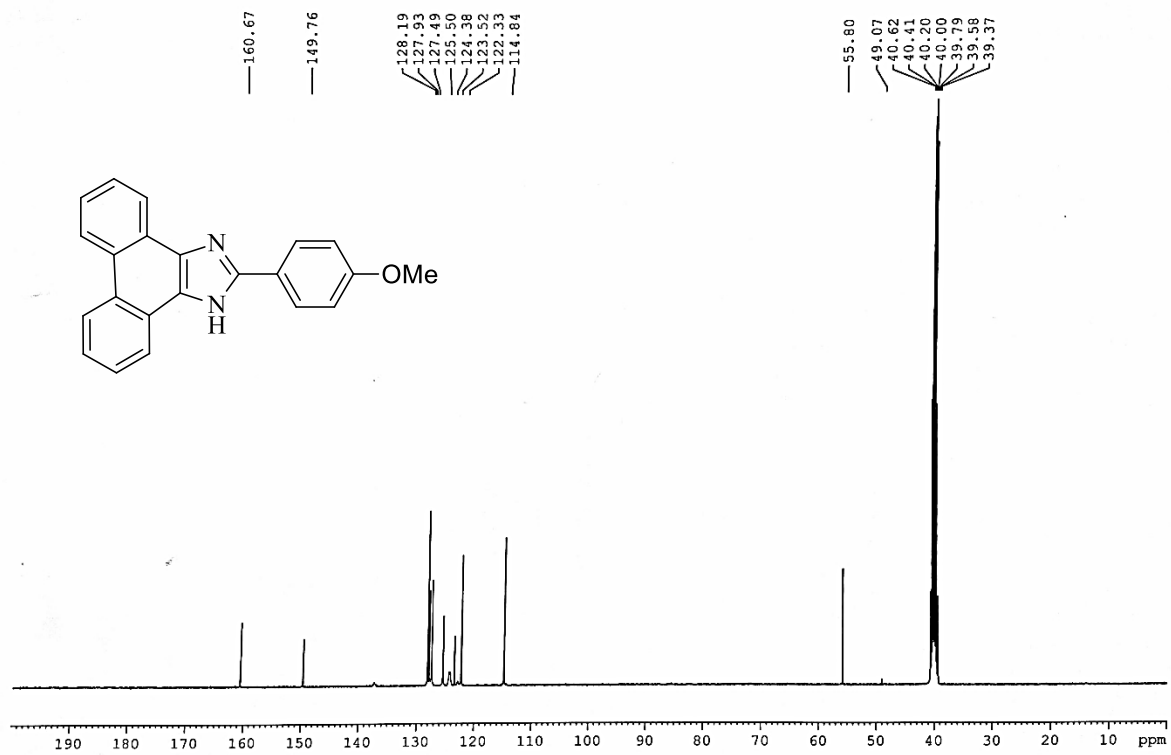

$^1\text{H}$  NMR (400 MHz,  $\text{CDCl}_3$ ) of **(3h)**

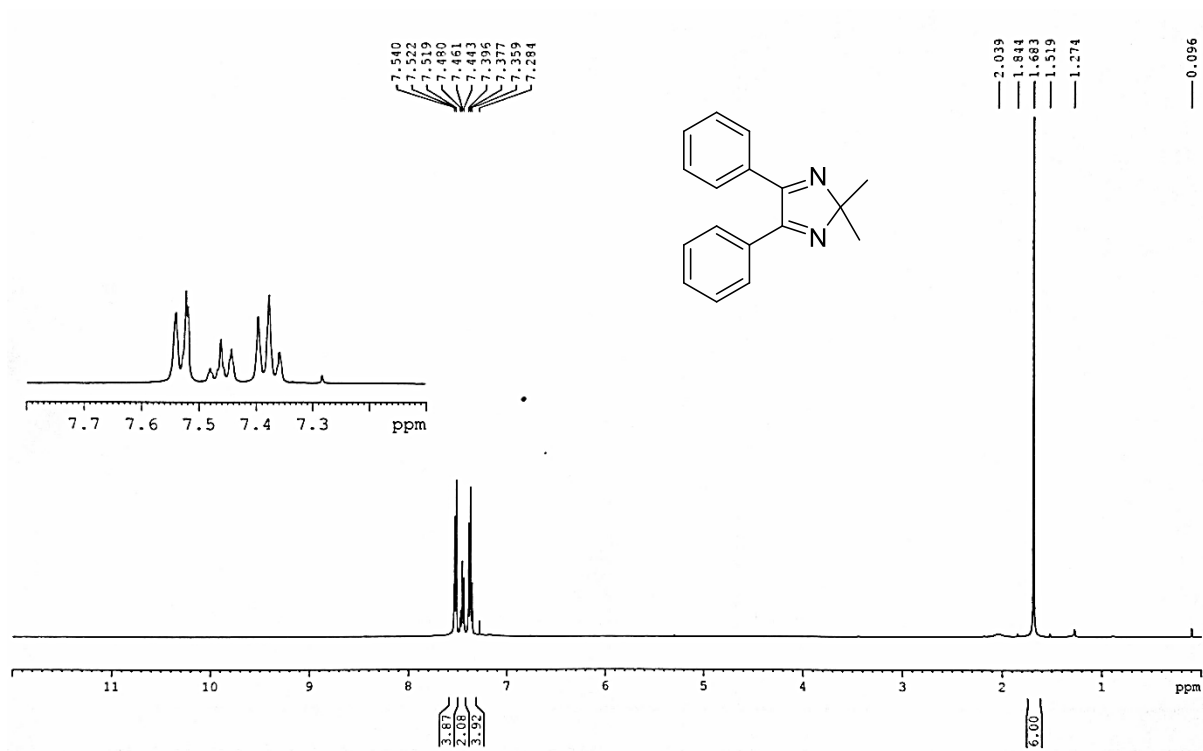

$^{13}\text{C}$  NMR (100 MHz,  $\text{CDCl}_3$ ) of **(3h)**

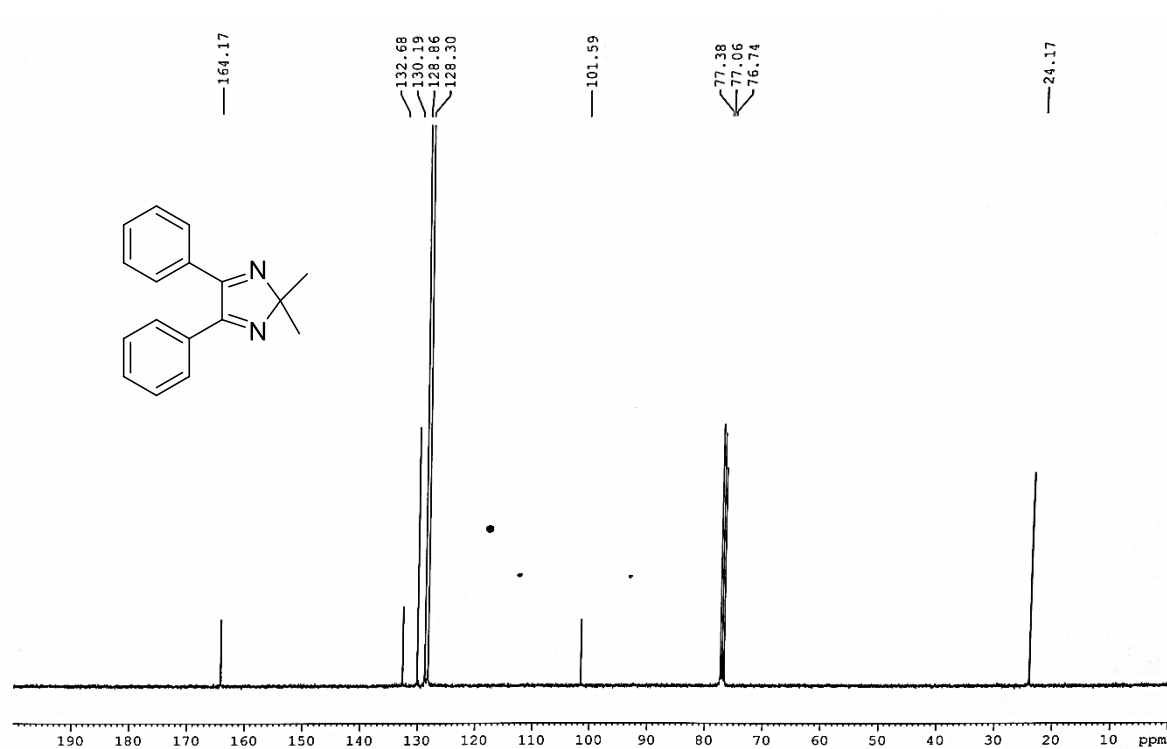





<sup>1</sup>H NMR (400 MHz, CDCl<sub>3</sub>) of (**5b**)

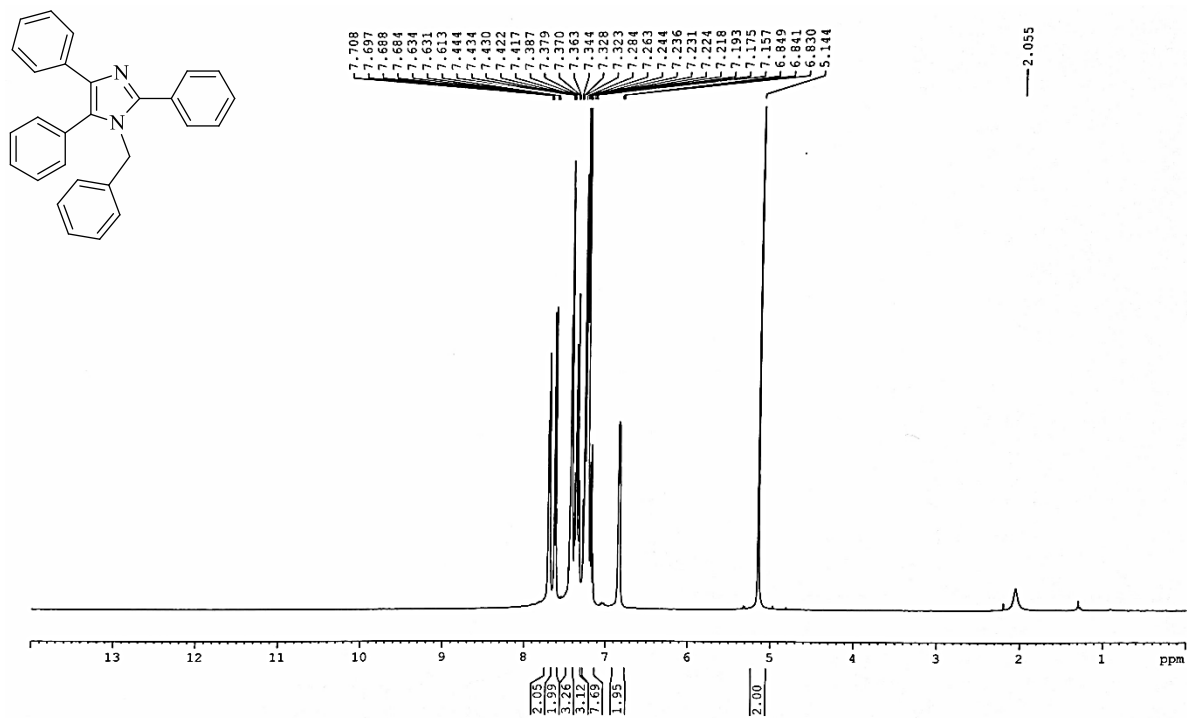

<sup>13</sup>C NMR (100 MHz, CDCl<sub>3</sub>) of (**5b**)

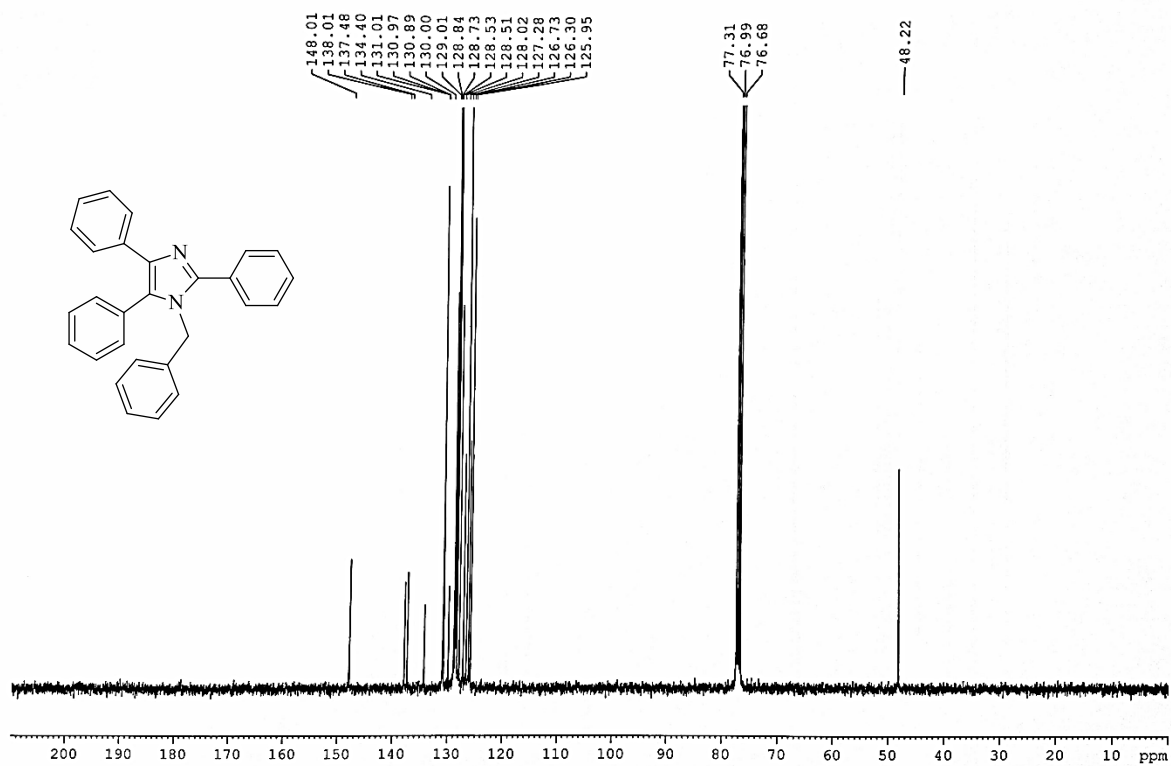

$^1\text{H}$  NMR (400 MHz,  $\text{CDCl}_3$ ) of (5c)

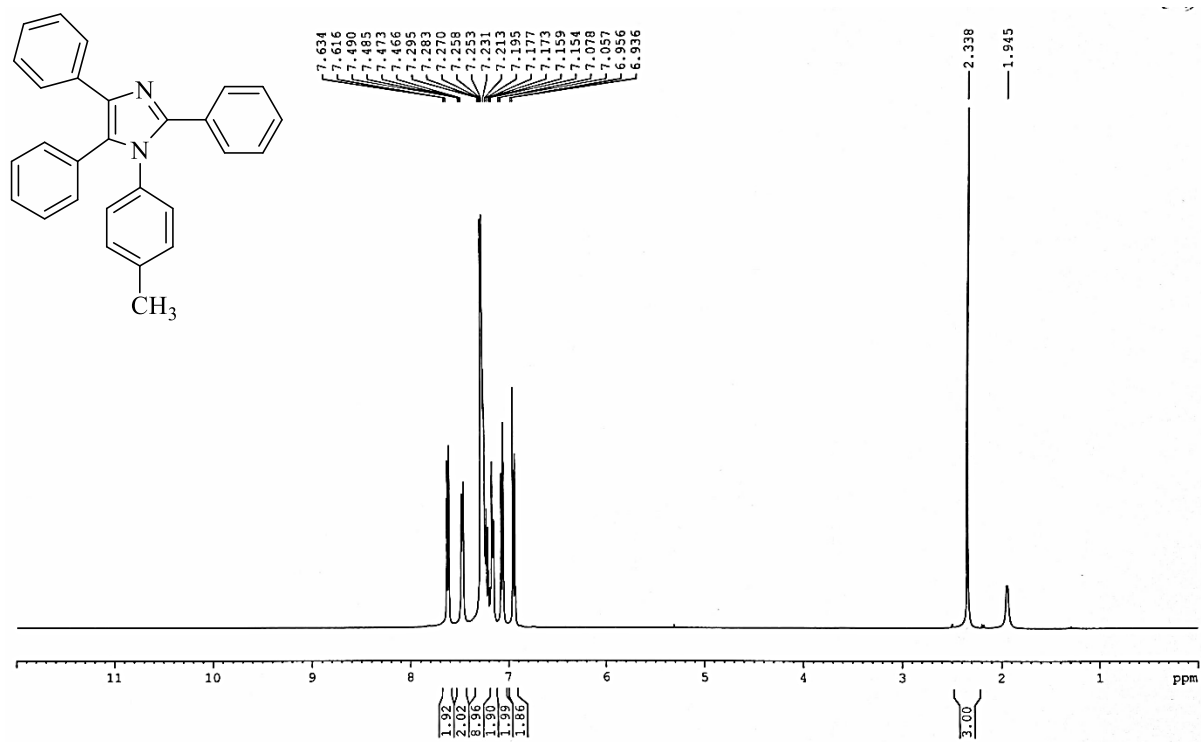

$^{13}\text{C}$  NMR (100 MHz,  $\text{CDCl}_3$ ) of (5c)

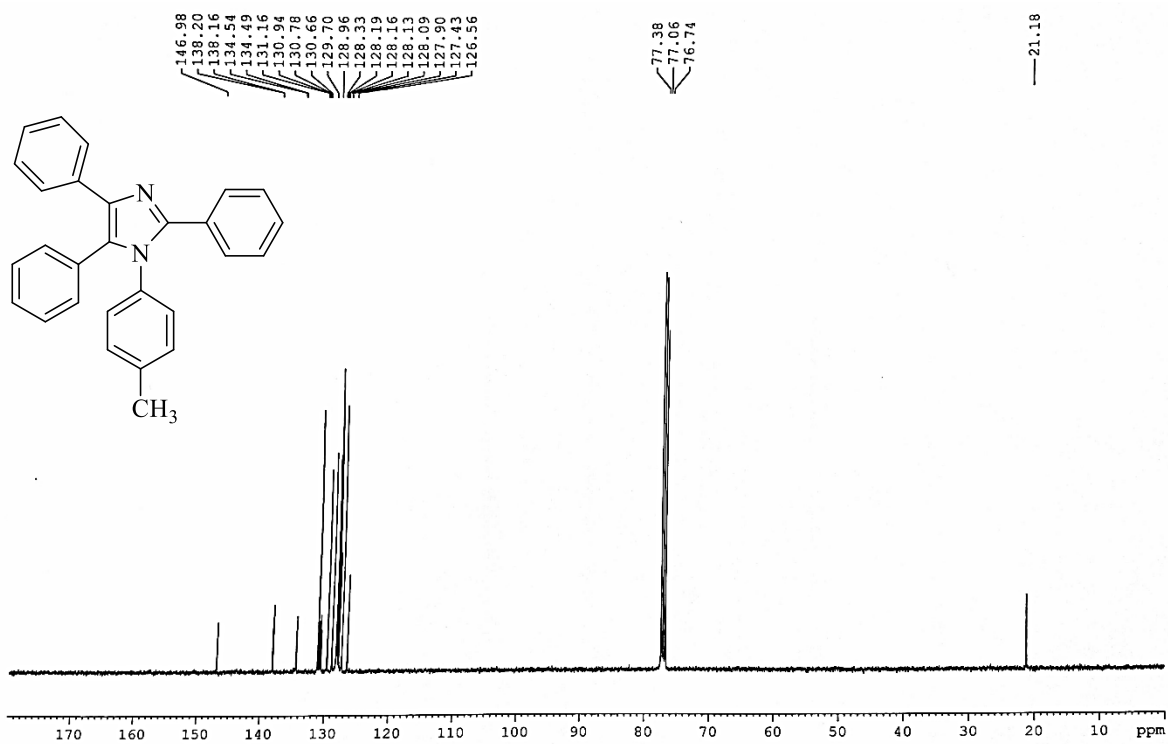

$^1\text{H}$  NMR (400 MHz,  $\text{CDCl}_3$ ) of **(5d)**

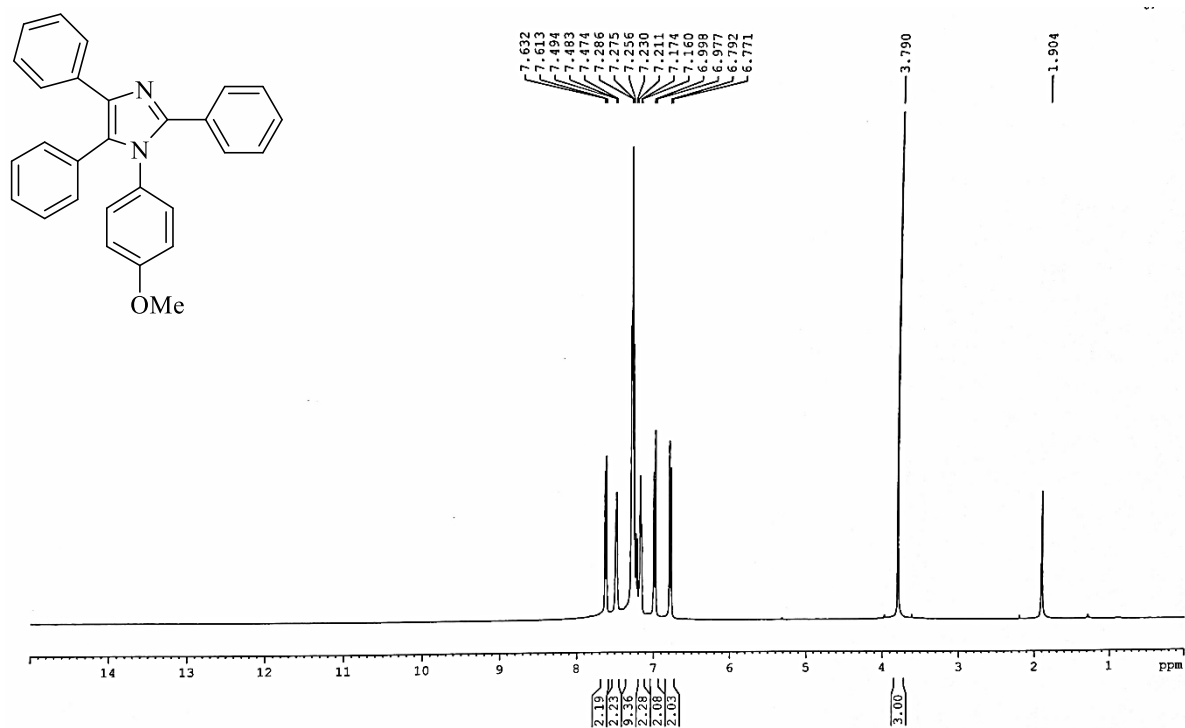

$^{13}\text{C}$  NMR (100 MHz,  $\text{CDCl}_3$ ) of **(5d)**

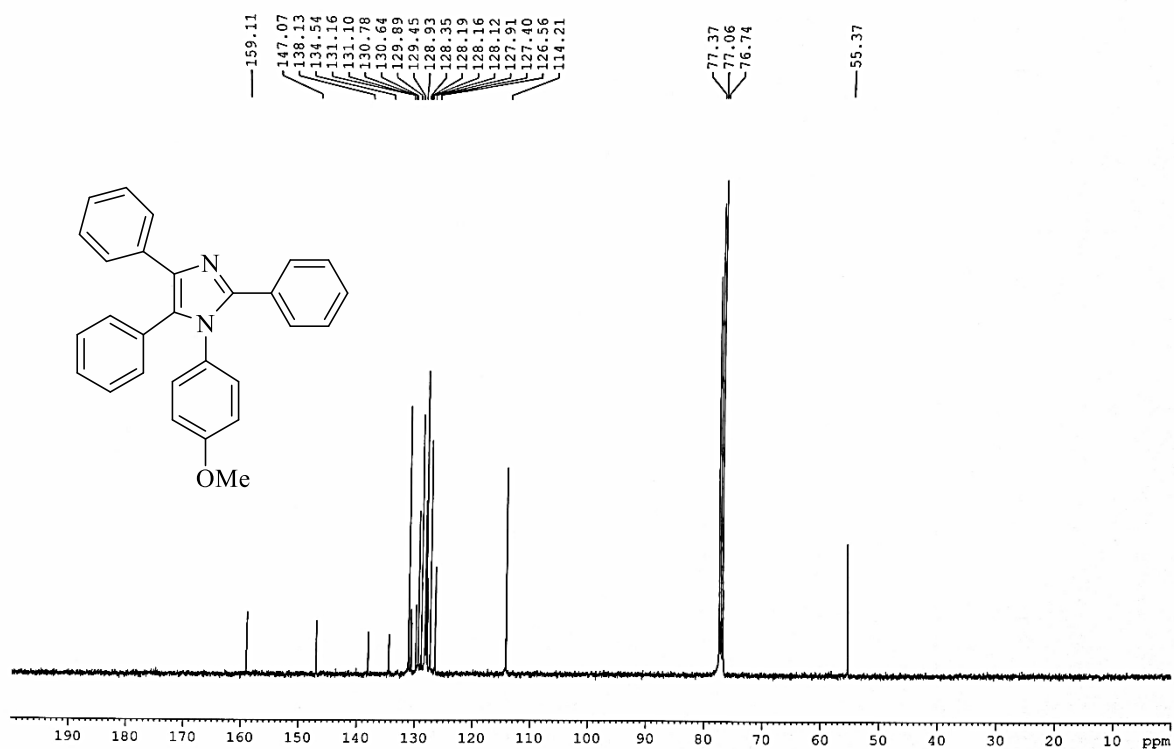

$^1\text{H}$  NMR (400 MHz,  $\text{CDCl}_3$ ) of (5e)

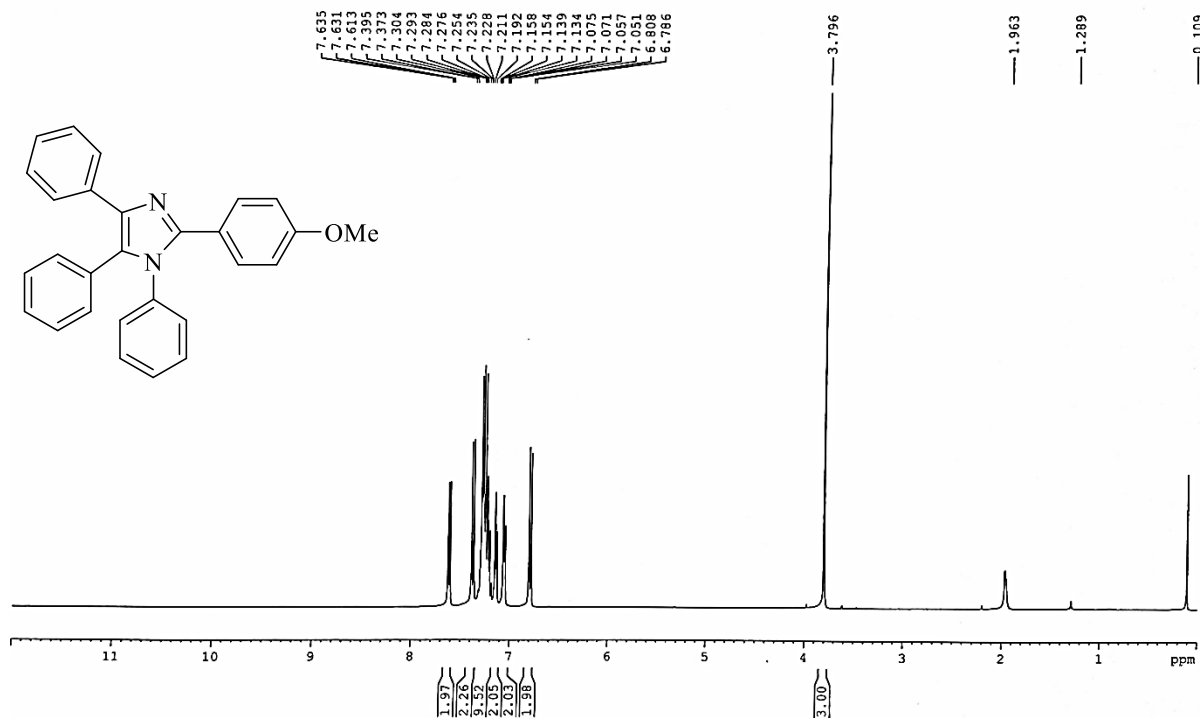

$^{13}\text{C}$  NMR (100 MHz,  $\text{CDCl}_3$ ) of (5e)

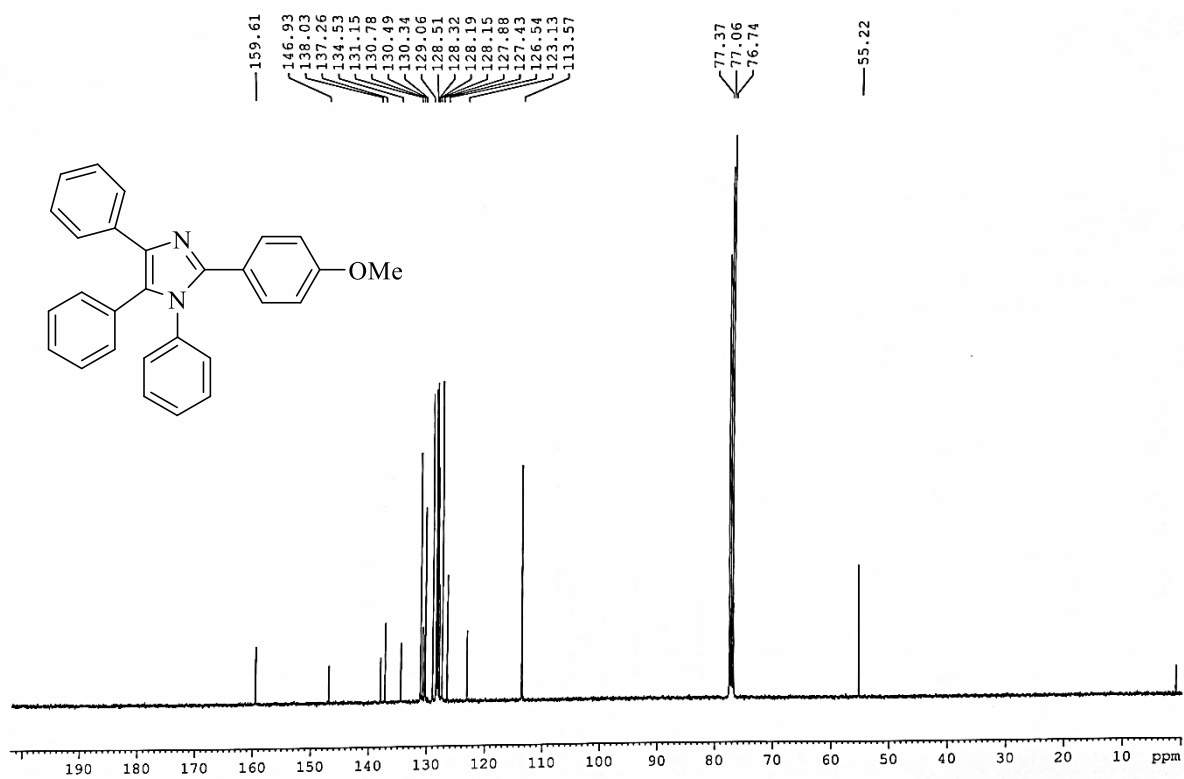

$^1\text{H}$  NMR (400 MHz,  $\text{CDCl}_3$ ) of (**5f**)

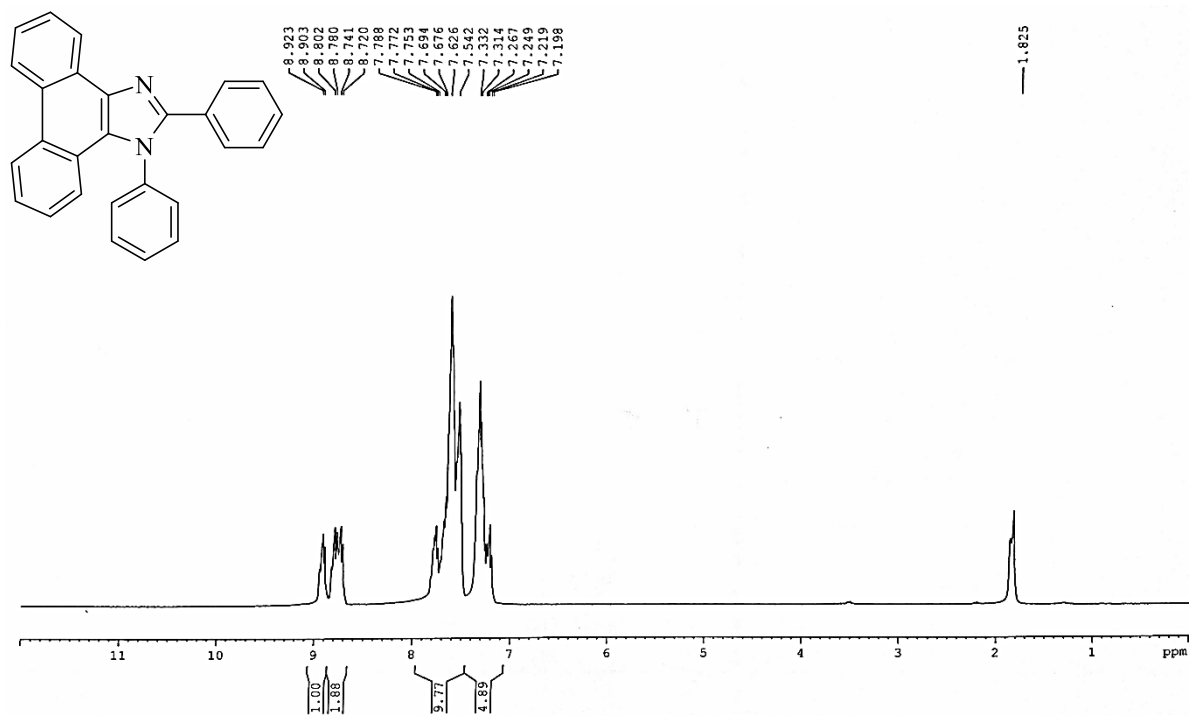

$^{13}\text{C}$  NMR (100 MHz,  $\text{CDCl}_3$ ) of (**5f**)

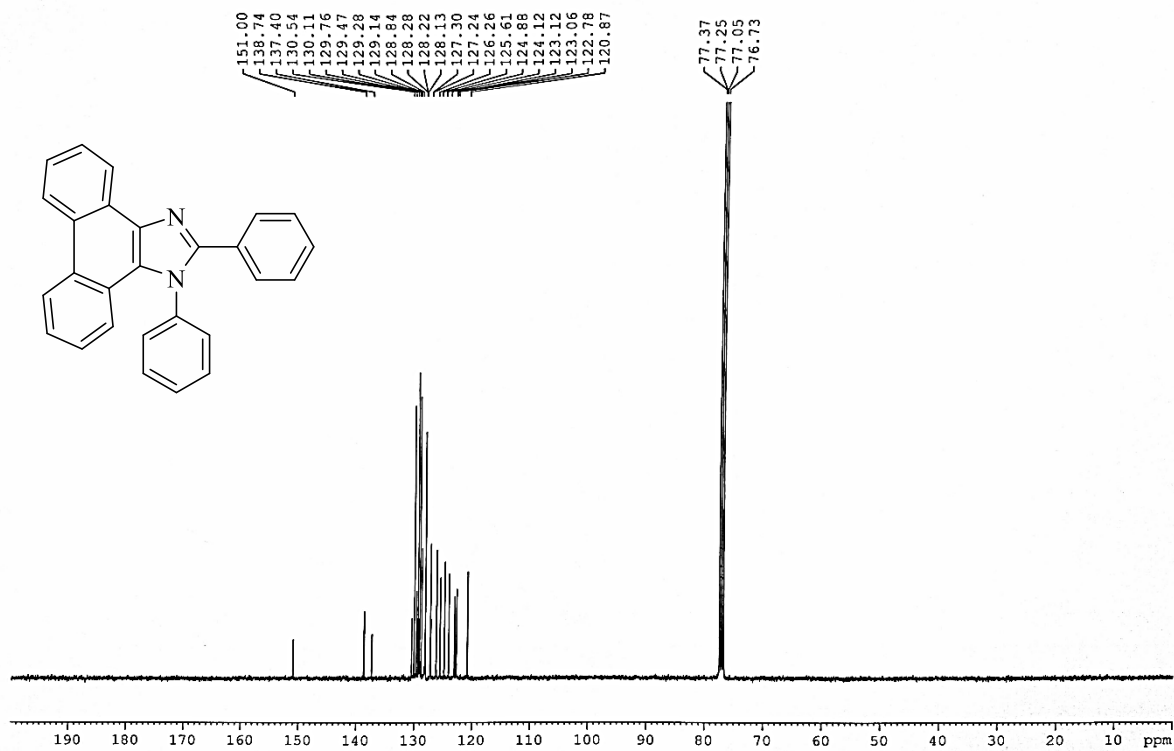

$^1\text{H}$  NMR (400 MHz,  $\text{CDCl}_3$ ) of (**5g**)

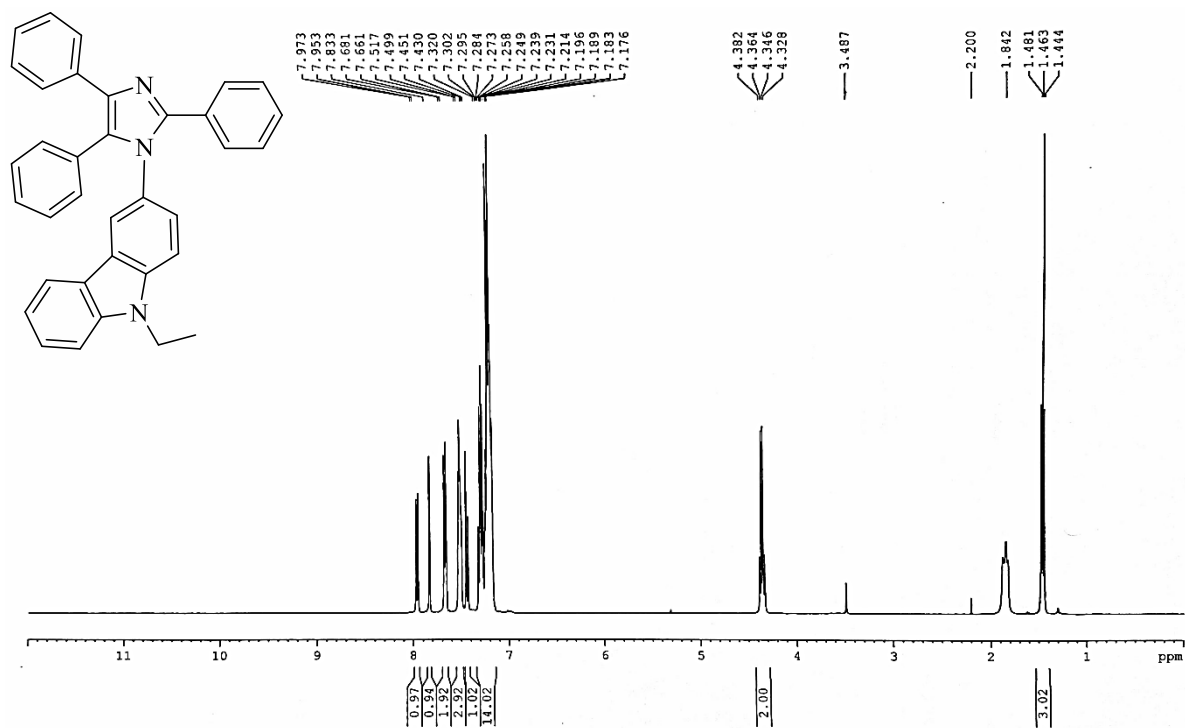

$^{13}\text{C}$  NMR (100 MHz,  $\text{CDCl}_3$ ) of (**5g**)

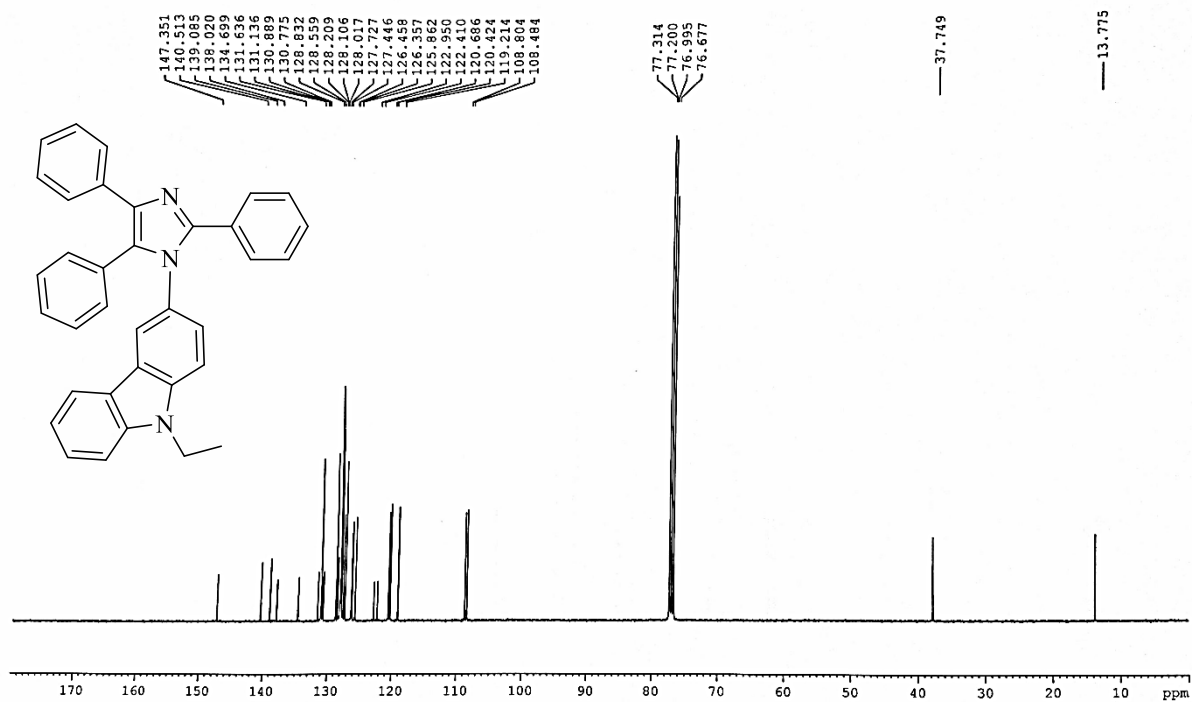

## HRMS spectra of 3d

E:\EXPLORIS DATA\...CRR-AK-93

1180177665  
01/16/24 14:37:36  
R:A1

Thermo Scientific Orbitrap Exploris 120  
Analysed by G SAIKRISHNA

CRR-AK-93 #2-27 RT: 0.02-0.11 AV: 6 SB: 49 0.32-1.20 NL: 1.99E9  
T: FTMS + p ESI Full ms [50.0000-750.0000]

CSIR-INDIAN INSTITUTE OF CHEMICAL TECHNOLOGY  
DEPARTMENT OF ANALYTICAL & STRUCTURAL CHEMISTRY  
CENTER FOR MASS SPECTROMETRY

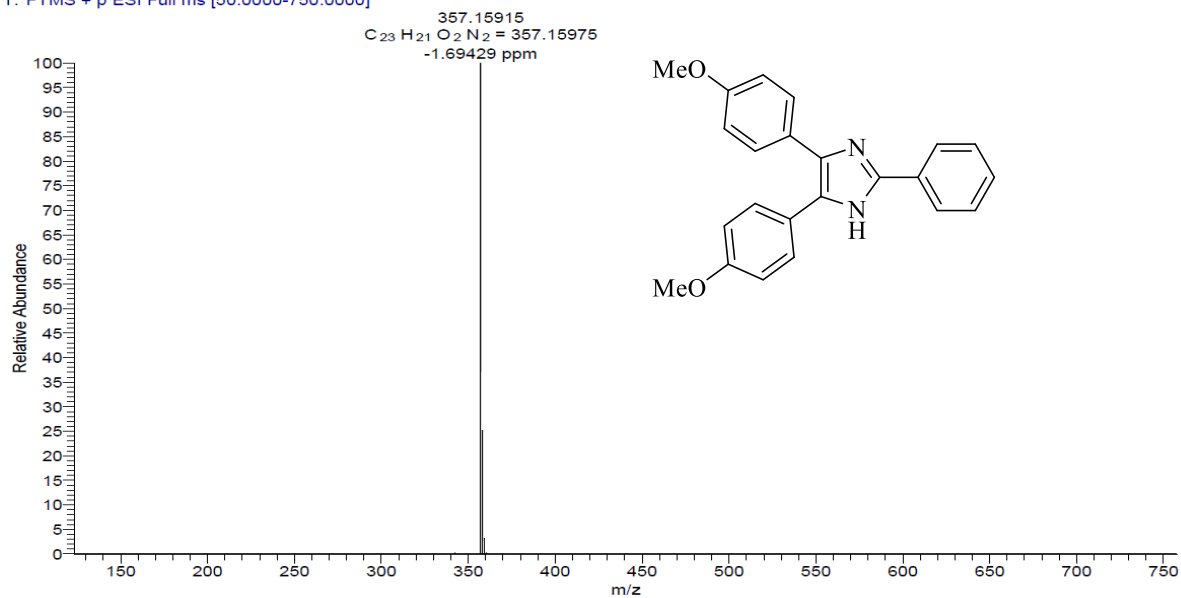

## HRMS spectra of 3e

E:\EXPLORIS DATA\...CRR-AK-100

180177667  
01/16/24 14:41:56  
R:A1

Thermo Scientific Orbitrap Exploris 120  
Analysed by G SAIKRISHNA

CRR-AK-100 #2-31 RT: 0.02-0.12 AV: 7 SB: 48 0.32-1.20 NL: 1.80E9  
T: FTMS + p ESI Full ms [50.0000-750.0000]

CSIR-INDIAN INSTITUTE OF CHEMICAL TECHNOLOGY  
DEPARTMENT OF ANALYTICAL & STRUCTURAL CHEMISTRY  
CENTER FOR MASS SPECTROMETRY

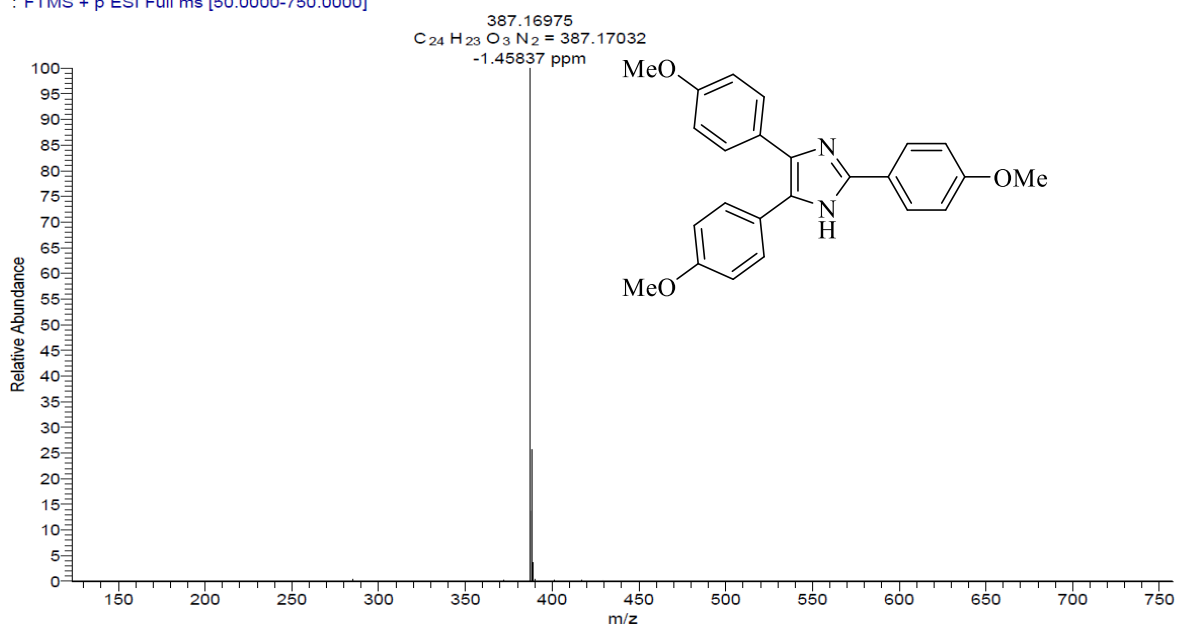



## HRMS spectra of 3h

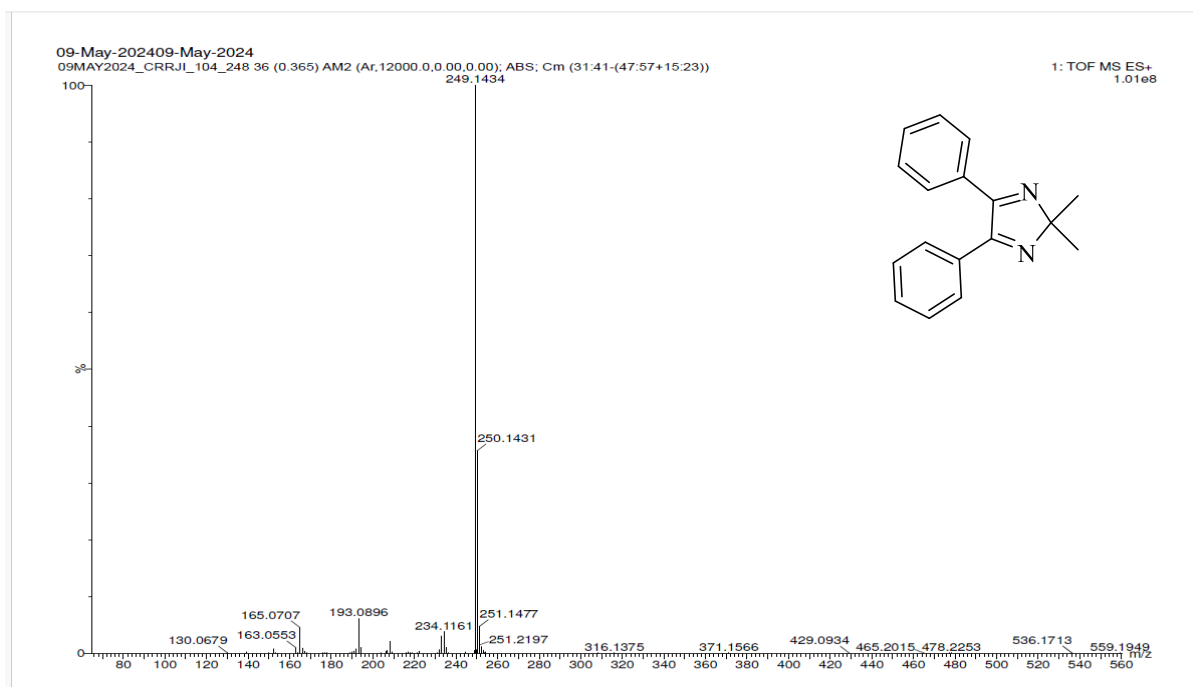

## HRMS spectra of 5f

E:\EXPLORIS DATA\...CRR-AK-102

1180177670  
01/16/24 14:11:52

R:A1

Thermo Scientific Orbitrap Exploris 120  
Analysed by G SAIKRISHNA

CRR-AK-102 #3-24 RT: 0.02-0.09 AV: 5 SB: 48 0.32-1.20 NL: 2.50E9

T: FTMS + p ESI Full ms [50.0000-750.0000]

CSIR-INDIAN INSTITUTE OF CHEMICAL TECHNOLOGY  
DEPARTMENT OF ANALYTICAL & STRUCTURAL CHEMISTRY  
CENTER FOR MASS SPECTROMETRY

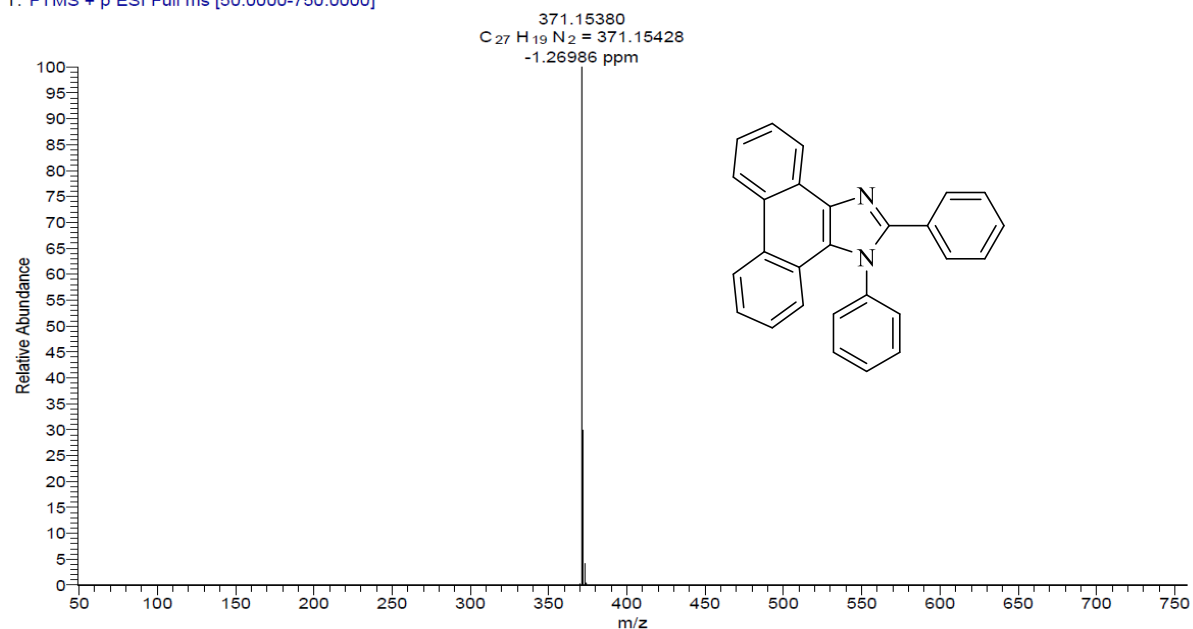

## HRMS spectra of 5g

EXPLORES DATA...CRR-AK-110

1180177671

01/16/24 14:20:32

R:A1

Thermo Scientific Orbitrap Exploris 120

Analysed by G SAIKRISHNA

CRR-AK-110 #3-25 RT: 0.02-0.11 AV: 6 SB: 47 0.32-1.20 NL: 1.10E9

FTMS + p ESI Full ms [50.0000-750.0000]

CSIR-INDIAN INSTITUTE OF CHEMICAL TECHNOLOGY  
DEPARTMENT OF ANALYTICAL & STRUCTURAL CHEMISTRY  
CENTER FOR MASS SPECTROMETRY

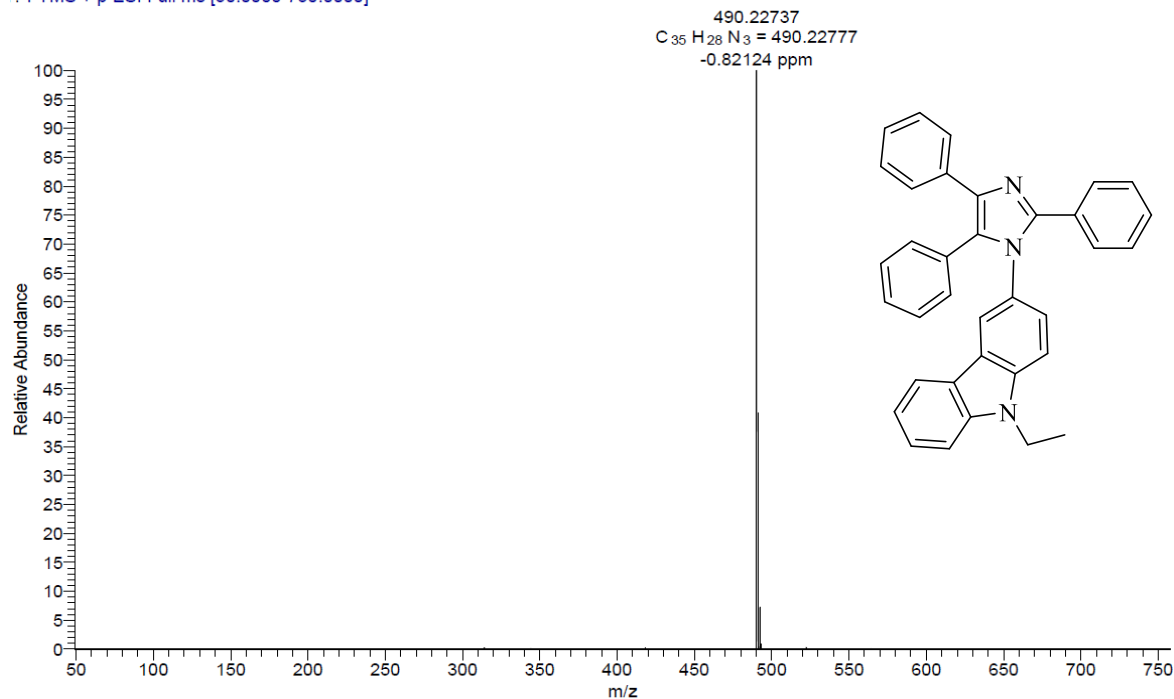

CCDC deposition number of 5g is 2361185

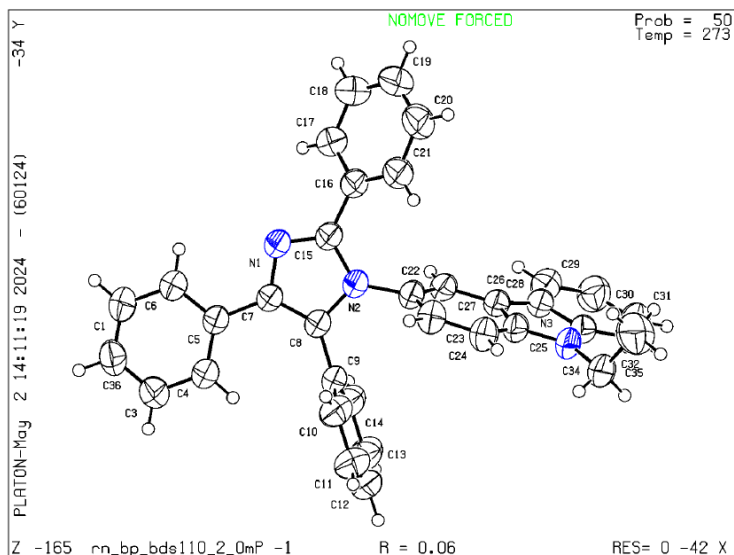

## Figures for Supporting Information

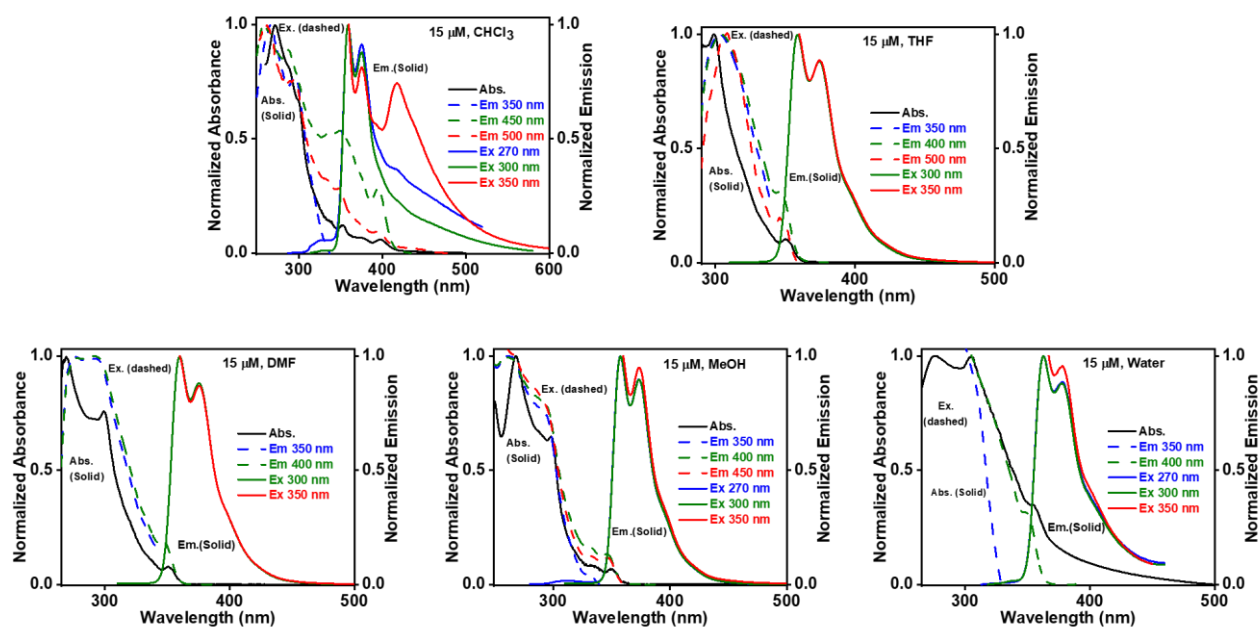

**Figure S1.** Absorption, emission and excitation spectra of **5g** in various solvents

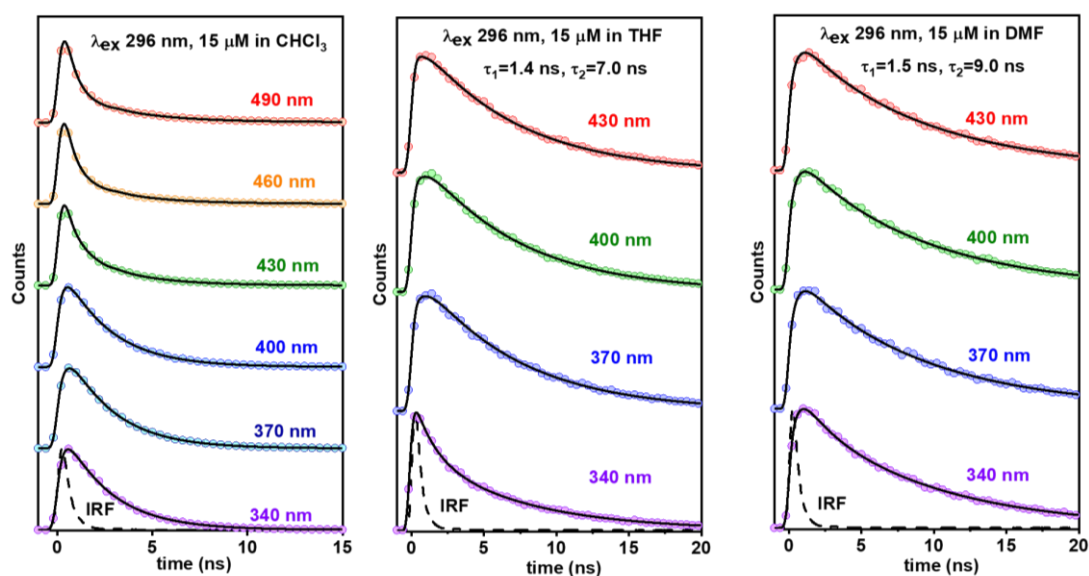

**Figure S2.** Lifetime emission decays of **5g** in aprotic solvents (15  $\mu\text{M}$ ). The excitation and monitoring wavelengths are provided in the insets.

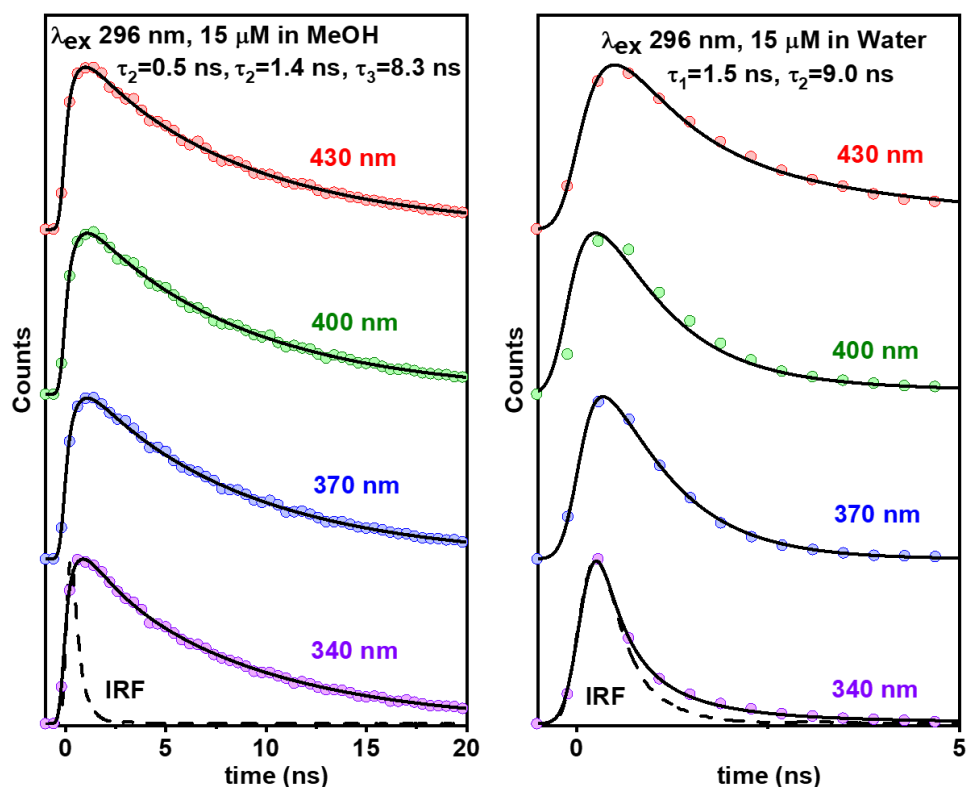

**Figure S3.** Lifetime emission decays of **5g** in protic solvents (15  $\mu$ M). The excitation and monitoring wavelengths are provided in the insets.

## Reference

1. L.-M. Recnik, M. A. El Hameid, M. Haider, M. Schnürch and M. D. Mihovilovic, *Synthesis* 2013, **45**, 1387–1405.
2. M. Chakraborty, B. Deb, B. Dey, S. A. Hussain, D. K. Maiti, S. Majumdar, *ChemistrySelect*, **2017**, 2, 241-245.
3. N. L. Higuera, D. Peña-Solórzano, C. Ochoa-Puentes, *Synlett*, 2019, **30**, 225-229.
4. S. Damavandi, *Heterocycl. Commun.*, 2011, **17**, 79-81.
5. D. Kumar, D. N. Kommi, N. Bollineni, A. R. Patel and A. K. Chakraborti, *Green Chem.*, 2012, 14, 2038–2049
6. S. S. Dipake, V. D. Ingale, S. A. Korde, M. K. Lande, A. S. Rajbhoj, S. T. Gaikwad, *RSC Adv.*, 2022, **12**, 4358-4369.
7. J. Li, S. Lin, J. Dai and W. Su, *J. Chem. Res.*, 2010, 196–199
8. Y. Ran, M. Li, Z. Ze. Zhang, *Molecules*, 2015, **20**, 20286-20296.

# HPLC chromatogram of 5g

## Single Injection Report

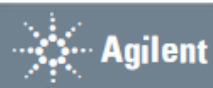

**Data file:** BDS-110\_Peak Purity\_10ug\_100%ACN\_2024-09-28 14-32-39+05-30.dx  
**Sequence Name:** SingleSample **Project Name:** AcharyaLab  
**Sample name:** BDS-110\_Peak Purity\_10ug\_100%ACN\_2024-09-28 14:32:39+05:30 **Operator:** SYSTEM (SYSTEM)  
**Instrument:** AcharyaLab-HPLC **Injection date:** 2024-09-28 14:35:44+05:30  
**Inj. volume:** 20.000 uL **Location:**  
**Acq. method:** Compound Screening\_Isocratic.amx **Type:** Sample  
**Processing method:** \*3D UV Quantitative\_DefaultMethod.pmx **Sample amount:** 10.00 ug/mL  
**Manually modified:** None

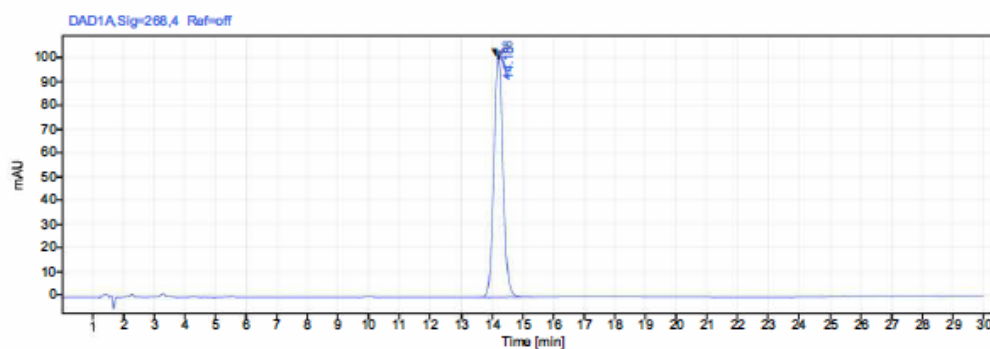

Signal: DAD1A,Sig=268,4 Ref=off

| RT [min] | Type | Width [min] | Peak Purity | Area           | Height | Area%  | Name    |
|----------|------|-------------|-------------|----------------|--------|--------|---------|
| 14.188   | BB   | 1.82        | 999.6       | 2080.37        | 99.72  | 100.00 | BDS 110 |
|          |      |             | <b>Sum</b>  | <b>2080.37</b> |        |        |         |

## **XRD data**

# RN\_BP\_BDS110\_2\_0m\_a

**Table 1 Crystal data and structure refinement for RN\_BP\_BDS110\_2\_0m\_a.**

|                                             |                                                                |
|---------------------------------------------|----------------------------------------------------------------|
| Identification code                         | RN_BP_BDS110_2_0m_a                                            |
| Empirical formula                           | C <sub>36</sub> H <sub>29</sub> Cl <sub>2</sub> N <sub>3</sub> |
| Formula weight                              | 574.52                                                         |
| Temperature/K                               | 273.15                                                         |
| Crystal system                              | triclinic                                                      |
| Space group                                 | P-1                                                            |
| a/Å                                         | 10.137(2)                                                      |
| b/Å                                         | 11.456(3)                                                      |
| c/Å                                         | 13.238(3)                                                      |
| α/°                                         | 113.447(9)                                                     |
| β/°                                         | 91.736(10)                                                     |
| γ/°                                         | 95.668(10)                                                     |
| Volume/Å <sup>3</sup>                       | 1399.5(6)                                                      |
| Z                                           | 2                                                              |
| ρ <sub>calc</sub> /cm <sup>3</sup>          | 1.363                                                          |
| μ/mm <sup>-1</sup>                          | 2.323                                                          |
| F(000)                                      | 600.0                                                          |
| Crystal size/mm <sup>3</sup>                | 0.07 × 0.05 × 0.02                                             |
| Radiation                                   | Cu Kα (λ = 1.54178)                                            |
| 2θ range for data collection/°              | 8.474 to 136.828                                               |
| Index ranges                                | -12 ≤ h ≤ 11, -13 ≤ k ≤ 13, -15 ≤ l ≤ 15                       |
| Reflections collected                       | 45395                                                          |
| Independent reflections                     | 4889 [R <sub>int</sub> = 0.0612, R <sub>sigma</sub> = 0.0315]  |
| Data/restraints/parameters                  | 4889/0/344                                                     |
| Goodness-of-fit on F <sup>2</sup>           | 1.033                                                          |
| Final R indexes [I ≥ 2σ (I)]                | R <sub>1</sub> = 0.0649, wR <sub>2</sub> = 0.2066              |
| Final R indexes [all data]                  | R <sub>1</sub> = 0.0692, wR <sub>2</sub> = 0.2120              |
| Largest diff. peak/hole / e Å <sup>-3</sup> | 0.16/-0.21                                                     |

**Table 2 Fractional Atomic Coordinates ( $\times 10^4$ ) and Equivalent Isotropic Displacement Parameters ( $\text{\AA}^2 \times 10^3$ ) for RN\_BP\_BDS110\_2\_0m\_a.  $U_{\text{eq}}$  is defined as 1/3 of the trace of the orthogonalised  $U_{\text{IJ}}$  tensor.**

| Atom | x            | y           | z           | U(eq)      |
|------|--------------|-------------|-------------|------------|
| N1   | 6799.0 (15)  | 8794.1 (15) | 4344.1 (12) | 55.5 (4)   |
| N2   | 4795.6 (15)  | 8100.6 (15) | 3464.5 (12) | 55.9 (4)   |
| N3   | -147.0 (15)  | 5476.9 (17) | 1552.2 (14) | 62.4 (4)   |
| C1   | 10158 (2)    | 10898 (3)   | 3772 (3)    | 89.7 (8)   |
| C36  | 10126 (2)    | 11319 (2)   | 2946 (2)    | 76.5 (6)   |
| C3   | 8971 (3)     | 11082 (3)   | 2302 (2)    | 92.8 (8)   |
| C4   | 7855 (2)     | 10405 (3)   | 2478 (2)    | 89.0 (8)   |
| C5   | 7877.2 (17)  | 9947.9 (17) | 3296.0 (14) | 54.6 (4)   |
| C6   | 9042 (2)     | 10223 (2)   | 3947 (2)    | 75.8 (6)   |
| C7   | 6721.8 (17)  | 9195.9 (17) | 3495.5 (14) | 53.1 (4)   |
| C8   | 5487.5 (18)  | 8775.6 (18) | 2937.6 (15) | 56.3 (4)   |
| C9   | 4868.1 (18)  | 8858 (2)    | 1949.7 (16) | 61.7 (5)   |
| C10  | 4161 (2)     | 9863 (3)    | 2038 (2)    | 83.0 (7)   |
| C11  | 3560 (3)     | 9935 (3)    | 1125 (3)    | 105.1 (10) |
| C12  | 3669 (3)     | 8990 (4)    | 109 (3)     | 108.8 (12) |
| C13  | 4371 (3)     | 7989 (4)    | -2 (2)      | 102.1 (10) |
| C14  | 4971 (2)     | 7915 (3)    | 921.0 (19)  | 81.7 (7)   |
| C15  | 5639.1 (17)  | 8139.0 (17) | 4308.0 (14) | 54.6 (4)   |
| C16  | 5323.2 (19)  | 7500.3 (18) | 5053.4 (15) | 58.6 (5)   |
| C17  | 6351 (2)     | 7021 (2)    | 5435.2 (18) | 69.6 (5)   |
| C18  | 6119 (3)     | 6454 (3)    | 6169 (2)    | 82.2 (7)   |
| C19  | 4879 (3)     | 6357 (3)    | 6527 (2)    | 87.5 (7)   |
| C20  | 3864 (3)     | 6813 (3)    | 6159 (2)    | 85.9 (7)   |
| C21  | 4069 (2)     | 7391 (2)    | 5424.2 (17) | 71.1 (6)   |
| C22  | 3479.8 (17)  | 7435.8 (19) | 3077.2 (15) | 56.0 (4)   |
| C23  | 2403.2 (19)  | 8154 (2)    | 3238.3 (17) | 64.9 (5)   |
| C24  | 1145 (2)     | 7575 (2)    | 2766.0 (18) | 66.5 (5)   |
| C25  | 983.8 (17)   | 6267.8 (19) | 2144.8 (16) | 57.5 (4)   |
| C26  | 2050.2 (17)  | 5525.6 (18) | 2014.9 (14) | 53.5 (4)   |
| C27  | 3313.5 (17)  | 6133.6 (18) | 2479.5 (15) | 54.7 (4)   |
| C28  | 1525.7 (18)  | 4221.5 (19) | 1324.6 (15) | 57.5 (4)   |
| C29  | 2079 (2)     | 3073 (2)    | 907.5 (19)  | 71.3 (5)   |
| C30  | 1285 (3)     | 1973 (2)    | 203 (2)     | 82.9 (7)   |
| C31  | -33 (3)      | 2011 (2)    | -78 (2)     | 83.0 (7)   |
| C32  | -623 (2)     | 3132 (2)    | 337.0 (18)  | 71.8 (6)   |
| C33  | 177.4 (18)   | 4239 (2)    | 1046.8 (15) | 59.5 (5)   |
| C34  | -1449.3 (19) | 5885 (2)    | 1470 (2)    | 73.1 (6)   |
| C35  | -2352 (3)    | 5757 (3)    | 2307 (3)    | 102.9 (9)  |



**Table 3 Anisotropic Displacement Parameters ( $\text{\AA}^2 \times 10^3$ ) for RN\_BP\_BDS110\_2\_0m\_a. The Anisotropic displacement factor exponent takes the form:  $-2\pi^2[h^2a^{*2}U_{11}+2hka^*b^*U_{12}+\dots]$ .**

| Atom | $U_{11}$  | $U_{22}$   | $U_{33}$   | $U_{23}$  | $U_{13}$   | $U_{12}$   |
|------|-----------|------------|------------|-----------|------------|------------|
| N1   | 48.1 (8)  | 64.5 (9)   | 51.6 (8)   | 23.8 (7)  | -4.9 (6)   | -2.8 (6)   |
| N2   | 46.2 (8)  | 67.6 (9)   | 52.9 (8)   | 26.7 (7)  | -5.8 (6)   | -5.6 (6)   |
| N3   | 40.4 (8)  | 78.7 (11)  | 68.1 (9)   | 32.9 (8)  | -3.6 (7)   | -4.2 (7)   |
| C1   | 53.5 (12) | 115 (2)    | 113.5 (19) | 67.0 (17) | -16.9 (12) | -17.4 (12) |
| C36  | 59.6 (12) | 83.9 (14)  | 83.9 (15)  | 36.6 (12) | 4.6 (10)   | -13.9 (10) |
| C3   | 81.5 (16) | 125 (2)    | 80.2 (15)  | 60.8 (15) | -10.7 (12) | -31.6 (14) |
| C4   | 66.1 (13) | 129 (2)    | 80.8 (15)  | 64.2 (15) | -22.1 (11) | -32.3 (13) |
| C5   | 47.6 (9)  | 59.1 (10)  | 53.2 (9)   | 21.0 (8)  | -3.1 (7)   | -1.9 (7)   |
| C6   | 54.4 (11) | 96.7 (16)  | 87.9 (15)  | 55.5 (13) | -14.5 (10) | -11.5 (10) |
| C7   | 47.2 (9)  | 61.2 (10)  | 49.8 (9)   | 23.5 (7)  | -2.9 (7)   | -0.7 (7)   |
| C8   | 48.6 (9)  | 65.8 (10)  | 53.5 (9)   | 26.6 (8)  | -5.8 (7)   | -4.7 (8)   |
| C9   | 47.3 (9)  | 78.8 (12)  | 61.2 (11)  | 36.0 (9)  | -11.1 (8)  | -12.1 (8)  |
| C10  | 77.0 (15) | 88.4 (15)  | 88.5 (15)  | 45.5 (13) | -20.8 (12) | -2.3 (12)  |
| C11  | 91.4 (19) | 125 (2)    | 122 (2)    | 81 (2)    | -34.0 (17) | -8.9 (17)  |
| C12  | 70.4 (16) | 177 (3)    | 106 (2)    | 99 (2)    | -32.8 (15) | -32.8 (19) |
| C13  | 80.1 (17) | 159 (3)    | 60.3 (13)  | 44.0 (16) | -8.9 (12)  | -15.0 (18) |
| C14  | 67.4 (13) | 111.6 (18) | 61.4 (12)  | 33.5 (12) | -5.9 (10)  | -0.8 (12)  |
| C15  | 49.5 (9)  | 62.9 (10)  | 49.1 (9)   | 22.4 (8)  | -3.1 (7)   | -0.7 (8)   |
| C16  | 58.1 (10) | 63.6 (10)  | 49.7 (9)   | 21.5 (8)  | -3.9 (8)   | -4.9 (8)   |
| C17  | 64.4 (12) | 84.3 (14)  | 65.5 (12)  | 38.5 (10) | -3.5 (9)   | -0.9 (10)  |
| C18  | 90.4 (16) | 92.1 (16)  | 76.2 (14)  | 49.2 (13) | -4.3 (12)  | 2.4 (13)   |
| C19  | 97.8 (18) | 102.6 (18) | 73.7 (14)  | 53.0 (13) | 1.1 (13)   | -9.0 (14)  |
| C20  | 78.5 (15) | 105.3 (18) | 76.9 (15)  | 43.9 (14) | 13.0 (12)  | -9.0 (13)  |
| C21  | 64.3 (12) | 87.6 (14)  | 62.7 (12)  | 34.5 (10) | 5.2 (9)    | -2.9 (10)  |
| C22  | 43.8 (9)  | 69.5 (11)  | 53.3 (9)   | 26.4 (8)  | -3.6 (7)   | -3.9 (8)   |
| C23  | 54.8 (11) | 65.2 (11)  | 68.2 (12)  | 21.6 (9)  | 1.7 (9)    | 1.4 (8)    |
| C24  | 49.1 (10) | 72.5 (12)  | 74.9 (13)  | 27.2 (10) | 4.0 (9)    | 5.7 (8)    |
| C25  | 41.7 (9)  | 73.3 (11)  | 58.0 (10)  | 29.6 (9)  | 0.3 (7)    | -2.9 (8)   |
| C26  | 45.4 (9)  | 66.5 (10)  | 49.9 (9)   | 27.0 (8)  | 0.2 (7)    | -1.0 (7)   |
| C27  | 45.2 (9)  | 68.2 (11)  | 53.2 (9)   | 28.4 (8)  | -0.6 (7)   | 1.9 (7)    |
| C28  | 50.0 (9)  | 69.1 (11)  | 53.1 (9)   | 27.2 (8)  | -1.3 (7)   | -3.6 (8)   |
| C29  | 67.2 (12) | 70.9 (12)  | 72.9 (13)  | 28.5 (10) | -7.3 (10)  | 1.7 (10)   |
| C30  | 87.5 (16) | 65.6 (13)  | 86.4 (15)  | 24.8 (11) | -9.9 (12)  | -1.8 (11)  |
| C31  | 84.0 (16) | 77.6 (14)  | 76.2 (14)  | 27.3 (11) | -15.0 (12) | -19.2 (12) |
| C32  | 58.8 (11) | 83.6 (14)  | 69.2 (12)  | 33.6 (11) | -9.4 (9)   | -16.8 (10) |
| C33  | 50.5 (10) | 74.2 (12)  | 54.4 (10)  | 30.7 (9)  | -2.2 (8)   | -8.5 (8)   |
| C34  | 42.8 (10) | 97.3 (15)  | 86.0 (14)  | 46.6 (12) | -2.7 (9)   | 0.0 (9)    |
| C35  | 69.9 (15) | 136 (2)    | 116 (2)    | 59.7 (19) | 35.4 (15)  | 22.2 (15)  |

**Table 4 Bond Lengths for RN\_BP\_BDS110\_2\_0m\_a.**

| Atom | Atom | Length/Å  | Atom | Atom | Length/Å  |
|------|------|-----------|------|------|-----------|
| N1   | C7   | 1.376 (2) | C13  | C14  | 1.385 (4) |
| N1   | C15  | 1.320 (2) | C15  | C16  | 1.469 (3) |
| N2   | C8   | 1.389 (2) | C16  | C17  | 1.394 (3) |
| N2   | C15  | 1.370 (2) | C16  | C21  | 1.389 (3) |
| N2   | C22  | 1.438 (2) | C17  | C18  | 1.380 (3) |
| N3   | C25  | 1.387 (2) | C18  | C19  | 1.366 (4) |
| N3   | C33  | 1.385 (3) | C19  | C20  | 1.359 (4) |
| N3   | C34  | 1.458 (3) | C20  | C21  | 1.388 (3) |
| C1   | C36  | 1.359 (3) | C22  | C23  | 1.402 (3) |
| C1   | C6   | 1.385 (3) | C22  | C27  | 1.372 (3) |
| C36  | C3   | 1.365 (3) | C23  | C24  | 1.383 (3) |
| C3   | C4   | 1.386 (3) | C24  | C25  | 1.382 (3) |
| C4   | C5   | 1.378 (3) | C25  | C26  | 1.413 (3) |
| C5   | C6   | 1.372 (3) | C26  | C27  | 1.392 (2) |
| C5   | C7   | 1.478 (2) | C26  | C28  | 1.441 (3) |
| C7   | C8   | 1.373 (2) | C28  | C29  | 1.392 (3) |
| C8   | C9   | 1.474 (3) | C28  | C33  | 1.409 (3) |
| C9   | C10  | 1.383 (3) | C29  | C30  | 1.387 (3) |
| C9   | C14  | 1.375 (3) | C30  | C31  | 1.386 (4) |
| C10  | C11  | 1.372 (4) | C31  | C32  | 1.386 (4) |
| C11  | C12  | 1.367 (5) | C32  | C33  | 1.397 (3) |
| C12  | C13  | 1.370 (5) | C34  | C35  | 1.500 (3) |

**Table 5 Bond Angles for RN\_BP\_BDS110\_2\_0m\_a.**

| Atom | Atom | Atom | Angle/°     | Atom | Atom | Atom | Angle/°     |
|------|------|------|-------------|------|------|------|-------------|
| C15  | N1   | C7   | 106.61 (15) | C17  | C16  | C15  | 118.00 (18) |
| C8   | N2   | C22  | 122.84 (15) | C21  | C16  | C15  | 123.36 (19) |
| C15  | N2   | C8   | 106.83 (15) | C21  | C16  | C17  | 118.61 (19) |
| C15  | N2   | C22  | 130.17 (16) | C18  | C17  | C16  | 120.4 (2)   |
| C25  | N3   | C34  | 125.72 (18) | C19  | C18  | C17  | 120.2 (2)   |
| C33  | N3   | C25  | 108.28 (16) | C20  | C19  | C18  | 120.2 (2)   |
| C33  | N3   | C34  | 126.01 (17) | C19  | C20  | C21  | 120.8 (2)   |
| C36  | C1   | C6   | 120.5 (2)   | C20  | C21  | C16  | 119.8 (2)   |
| C1   | C36  | C3   | 119.0 (2)   | C23  | C22  | N2   | 118.77 (17) |
| C36  | C3   | C4   | 120.4 (2)   | C27  | C22  | N2   | 119.72 (17) |
| C5   | C4   | C3   | 121.4 (2)   | C27  | C22  | C23  | 121.27 (17) |
| C4   | C5   | C7   | 123.25 (17) | C24  | C23  | C22  | 120.87 (19) |
| C6   | C5   | C4   | 117.00 (19) | C25  | C24  | C23  | 117.80 (19) |
| C6   | C5   | C7   | 119.75 (17) | N3   | C25  | C26  | 109.08 (17) |
| C5   | C6   | C1   | 121.7 (2)   | C24  | C25  | N3   | 129.09 (18) |
| N1   | C7   | C5   | 120.36 (15) | C24  | C25  | C26  | 121.83 (17) |
| C8   | C7   | N1   | 109.63 (16) | C25  | C26  | C28  | 106.64 (16) |
| C8   | C7   | C5   | 130.00 (16) | C27  | C26  | C25  | 119.26 (17) |
| N2   | C8   | C9   | 120.19 (16) | C27  | C26  | C28  | 133.99 (17) |
| C7   | C8   | N2   | 105.92 (16) | C22  | C27  | C26  | 118.89 (17) |
| C7   | C8   | C9   | 133.81 (17) | C29  | C28  | C26  | 133.71 (18) |
| C10  | C9   | C8   | 121.1 (2)   | C29  | C28  | C33  | 119.74 (18) |
| C14  | C9   | C8   | 120.0 (2)   | C33  | C28  | C26  | 106.53 (17) |
| C14  | C9   | C10  | 118.9 (2)   | C30  | C29  | C28  | 118.6 (2)   |
| C11  | C10  | C9   | 121.5 (3)   | C31  | C30  | C29  | 120.9 (2)   |
| C12  | C11  | C10  | 118.9 (3)   | C32  | C31  | C30  | 122.0 (2)   |
| C11  | C12  | C13  | 120.7 (2)   | C31  | C32  | C33  | 117.0 (2)   |
| C12  | C13  | C14  | 120.2 (3)   | N3   | C33  | C28  | 109.45 (16) |
| C9   | C14  | C13  | 119.7 (3)   | N3   | C33  | C32  | 128.81 (19) |
| N1   | C15  | N2   | 111.01 (16) | C32  | C33  | C28  | 121.7 (2)   |
| N1   | C15  | C16  | 124.03 (16) | N3   | C34  | C35  | 113.5 (2)   |
| N2   | C15  | C16  | 124.93 (16) |      |      |      |             |

**Table 6 Torsion Angles for RN\_BP\_BDS110\_2\_0m\_a.**

| A   | B   | C   | D   | Angle/°      | A   | B   | C   | D   | Angle/°      |
|-----|-----|-----|-----|--------------|-----|-----|-----|-----|--------------|
| N1  | C7  | C8  | N2  | 0.1 (2)      | C15 | N2  | C22 | C27 | -74.3 (3)    |
| N1  | C7  | C8  | C9  | -176.6 (2)   | C15 | C16 | C17 | C18 | 177.6 (2)    |
| N1  | C15 | C16 | C17 | -31.6 (3)    | C15 | C16 | C21 | C20 | -177.7 (2)   |
| N1  | C15 | C16 | C21 | 146.1 (2)    | C16 | C17 | C18 | C19 | 0.1 (4)      |
| N2  | C8  | C9  | C10 | 92.0 (2)     | C17 | C16 | C21 | C20 | 0.0 (3)      |
| N2  | C8  | C9  | C14 | -87.0 (2)    | C17 | C18 | C19 | C20 | 0.3 (4)      |
| N2  | C15 | C16 | C17 | 146.0 (2)    | C18 | C19 | C20 | C21 | -0.6 (4)     |
| N2  | C15 | C16 | C21 | -36.3 (3)    | C19 | C20 | C21 | C16 | 0.4 (4)      |
| N2  | C22 | C23 | C24 | 172.13 (18)  | C21 | C16 | C17 | C18 | -0.2 (3)     |
| N2  | C22 | C27 | C26 | -173.45 (15) | C22 | N2  | C8  | C7  | -175.94 (16) |
| N3  | C25 | C26 | C27 | 175.81 (15)  | C22 | N2  | C8  | C9  | 1.3 (3)      |
| N3  | C25 | C26 | C28 | -1.0 (2)     | C22 | N2  | C15 | N1  | 175.60 (17)  |
| C1  | C36 | C3  | C4  | -0.9 (4)     | C22 | N2  | C15 | C16 | -2.3 (3)     |
| C36 | C1  | C6  | C5  | 0.5 (4)      | C22 | C23 | C24 | C25 | 0.8 (3)      |
| C36 | C3  | C4  | C5  | -0.4 (5)     | C23 | C22 | C27 | C26 | 0.9 (3)      |
| C3  | C4  | C5  | C6  | 1.8 (4)      | C23 | C24 | C25 | N3  | -176.93 (19) |
| C3  | C4  | C5  | C7  | -178.5 (2)   | C23 | C24 | C25 | C26 | 1.9 (3)      |
| C4  | C5  | C6  | C1  | -1.8 (4)     | C24 | C25 | C26 | C27 | -3.2 (3)     |
| C4  | C5  | C7  | N1  | -178.4 (2)   | C24 | C25 | C26 | C28 | -179.97 (18) |
| C4  | C5  | C7  | C8  | 2.5 (3)      | C25 | N3  | C33 | C28 | 0.8 (2)      |
| C5  | C7  | C8  | N2  | 179.23 (18)  | C25 | N3  | C33 | C32 | -177.42 (19) |
| C5  | C7  | C8  | C9  | 2.5 (4)      | C25 | N3  | C34 | C35 | -93.7 (3)    |
| C6  | C1  | C36 | C3  | 0.9 (4)      | C25 | C26 | C27 | C22 | 1.8 (3)      |
| C6  | C5  | C7  | N1  | 1.4 (3)      | C25 | C26 | C28 | C29 | 179.7 (2)    |
| C6  | C5  | C7  | C8  | -177.7 (2)   | C25 | C26 | C28 | C33 | 1.4 (2)      |
| C7  | N1  | C15 | N2  | -0.3 (2)     | C26 | C28 | C29 | C30 | -176.6 (2)   |
| C7  | N1  | C15 | C16 | 177.67 (17)  | C26 | C28 | C33 | N3  | -1.3 (2)     |
| C7  | C5  | C6  | C1  | 178.4 (2)    | C26 | C28 | C33 | C32 | 177.00 (17)  |
| C7  | C8  | C9  | C10 | -91.7 (3)    | C27 | C22 | C23 | C24 | -2.3 (3)     |
| C7  | C8  | C9  | C14 | 89.3 (3)     | C27 | C26 | C28 | C29 | 3.6 (4)      |
| C8  | N2  | C15 | N1  | 0.3 (2)      | C27 | C26 | C28 | C33 | -174.69 (19) |
| C8  | N2  | C15 | C16 | -177.60 (17) | C28 | C26 | C27 | C22 | 177.45 (19)  |
| C8  | N2  | C22 | C23 | -74.2 (2)    | C28 | C29 | C30 | C31 | -0.3 (4)     |
| C8  | N2  | C22 | C27 | 100.3 (2)    | C29 | C28 | C33 | N3  | -179.89 (17) |
| C8  | C9  | C10 | C11 | -178.8 (2)   | C29 | C28 | C33 | C32 | -1.6 (3)     |
| C8  | C9  | C14 | C13 | 179.1 (2)    | C29 | C30 | C31 | C32 | -0.9 (4)     |
| C9  | C10 | C11 | C12 | -0.1 (4)     | C30 | C31 | C32 | C33 | 0.8 (4)      |
| C10 | C9  | C14 | C13 | 0.1 (3)      | C31 | C32 | C33 | N3  | 178.4 (2)    |
| C10 | C11 | C12 | C13 | -0.3 (4)     | C31 | C32 | C33 | C28 | 0.4 (3)      |
| C11 | C12 | C13 | C14 | 0.6 (4)      | C33 | N3  | C25 | C24 | 179.1 (2)    |
| C12 | C13 | C14 | C9  | -0.5 (4)     | C33 | N3  | C25 | C26 | 0.1 (2)      |
| C14 | C9  | C10 | C11 | 0.2 (4)      | C33 | N3  | C34 | C35 | 86.8 (3)     |
| C15 | N1  | C7  | C5  | -179.13 (16) | C33 | C28 | C29 | C30 | 1.5 (3)      |
| C15 | N1  | C7  | C8  | 0.1 (2)      | C34 | N3  | C25 | C24 | -0.5 (3)     |
| C15 | N2  | C8  | C7  | -0.2 (2)     | C34 | N3  | C25 | C26 | -179.38 (17) |
| C15 | N2  | C8  | C9  | 177.01 (18)  | C34 | N3  | C33 | C28 | -179.72 (18) |
| C15 | N2  | C22 | C23 | 111.2 (2)    | C34 | N3  | C33 | C32 | 2.1 (3)      |



**Table 7 Hydrogen Atom Coordinates ( $\text{\AA}\times 10^4$ ) and Isotropic Displacement Parameters ( $\text{\AA}^2\times 10^3$ ) for RN\_BP\_BDS110\_2\_0m\_a.**

| Atom | x        | y        | z       | U(eq) |
|------|----------|----------|---------|-------|
| H1   | 10935.7  | 11065    | 4222.24 | 108   |
| H36  | 10879.43 | 11762.39 | 2822.39 | 92    |
| H3   | 8933.12  | 11375.76 | 1741.54 | 111   |
| H4   | 7074.52  | 10257.23 | 2035.19 | 107   |
| H6   | 9082.28  | 9949.78  | 4519.58 | 91    |
| H10  | 4091.22  | 10503.77 | 2731.7  | 100   |
| H11  | 3086.45  | 10615.19 | 1197.52 | 126   |
| H12  | 3261.63  | 9027.81  | -514.99 | 131   |
| H13  | 4444.2   | 7357.28  | -699.07 | 123   |
| H14  | 5440.59  | 7231.82  | 845.64  | 98    |
| H17  | 7196.74  | 7082.8   | 5194.11 | 84    |
| H18  | 6809.56  | 6137.18  | 6420.31 | 99    |
| H19  | 4730.07  | 5978.92  | 7024.29 | 105   |
| H20  | 3021.45  | 6735.35  | 6401.91 | 103   |
| H21  | 3368.35  | 7704.31  | 5181.01 | 85    |
| H23  | 2536.91  | 9030.29  | 3668.5  | 78    |
| H24  | 430.64   | 8050.3   | 2863.26 | 80    |
| H27  | 4032.71  | 5665     | 2386.2  | 66    |
| H29  | 2962.13  | 3043.65  | 1097.04 | 86    |
| H30  | 1642.4   | 1199.88  | -84.16  | 99    |
| H31  | -537.73  | 1260.2   | -560.63 | 100   |
| H32  | -1511.5  | 3147.63  | 151.42  | 86    |
| H34A | -1871.44 | 5377.31  | 736.42  | 88    |
| H34B | -1330.82 | 6773.61  | 1563.26 | 88    |
| H35A | -2371.2  | 4912.22  | 2294.41 | 154   |
| H35B | -3232.89 | 5897.29  | 2132.95 | 154   |
| H35C | -2028.94 | 6380.49  | 3028.34 | 154   |

**Table 8 Solvent masks information for RN\_BP\_BDS110\_2\_0m\_a.**

| Number | X     | Y     | Z     | Volume | Electron count | Content |
|--------|-------|-------|-------|--------|----------------|---------|
| 1      | 0.000 | 0.500 | 0.500 | 121.5  | 59.92          | CH2Cl2  |
| 2      | 0.500 | 0.500 | 0.000 | 28.7   | 7.5?           |         |

**Experimental**

Single crystals of  $C_{36}H_{29}Cl_2N_3$  [RN\_BP\_BDS110\_2\_0m\_a] were [ ]. A suitable crystal was selected and [ ] on a **Bruker APEX3 IMuS Diamond Photon III** diffractometer. The crystal was kept at 273.15 K during data collection. Using Olex2 [1], the structure was solved with the SHELXT [2] structure solution program using Intrinsic Phasing and refined with the SHELXL [3] refinement package using Least Squares minimisation.

1. Dolomanov, O.V., Bourhis, L.J., Gildea, R.J., Howard, J.A.K. & Puschmann, H. (2009), *J. Appl. Cryst.* 42, 339-341.
2. Sheldrick, G.M. (2015). *Acta Cryst.* A71, 3-8.
3. Sheldrick, G.M. (2015). *Acta Cryst.* C71, 3-8.

**Crystal structure determination of [RN\_BP\_BDS110\_2\_0m\_a]**

**Crystal Data** for  $C_{36}H_{29}Cl_2N_3$  ( $M = 574.52$  g/mol): triclinic, space group P-1 (no. 2),  $a = 10.137(2)$  Å,  $b = 11.456(3)$  Å,  $c = 13.238(3)$  Å,  $\alpha = 113.447(9)^\circ$ ,  $\beta = 91.736(10)^\circ$ ,  $\gamma = 95.668(10)^\circ$ ,  $V = 1399.5(6)$  Å<sup>3</sup>,  $Z = 2$ ,  $T = 273.15$  K,  $\mu(\text{Cu K}\alpha) = 2.323$  mm<sup>-1</sup>,  $D_{\text{calc}} = 1.363$  g/cm<sup>3</sup>, 45395 reflections measured ( $8.474^\circ \leq 2\theta \leq 136.828^\circ$ ), 4889 unique ( $R_{\text{int}} = 0.0612$ ,  $R_{\text{sigma}} = 0.0315$ ) which were used in all calculations. The final  $R_1$  was 0.0649 ( $I > 2\sigma(I)$ ) and  $wR_2$  was 0.2120 (all data).

**Refinement model description**

Number of restraints - 0, number of constraints - unknown.

Details:

## 1. Fixed Uiso

At 1.2 times of:

All C(H) groups, All C(H,H) groups

At 1.5 times of:

All C(H,H,H) groups

## 2.a Secondary CH2 refined with riding coordinates:

C34(H34A,H34B)

## 2.b Aromatic/amide H refined with riding coordinates:

C1(H1), C36(H36), C3(H3), C4(H4), C6(H6), C10(H10), C11(H11), C12(H12),

C13(H13), C14(H14), C17(H17), C18(H18), C19(H19), C20(H20), C21(H21), C23(H23),

C24(H24), C27(H27), C29(H29), C30(H30), C31(H31), C32(H32)

## 2.c Idealised Me refined as rotating group:

C35(H35A,H35B,H35C)

This report has been created with Olex2, compiled on 2023.03.06 svn.rbb2c1857 for OlexSys. Please [let us know](#) if there are any errors or if you would like to have additional features.
